24 **ABSTRACT**

25 Plant pathogens secrete proteins called effectors that target host cellular processes to promote disease.  
26 Recently, structural genomics has identified several families of fungal effectors that share a similar three-  
27 dimensional structure despite remarkably variable amino-acid sequences and surface properties. To  
28 explore the selective forces that underlie the sequence variability of structurally-analogous effectors, we  
29 focused on MAX effectors, a structural family of effectors that are major determinants of virulence in the  
30 rice blast fungus *Pyricularia oryzae*. Using structure-informed gene annotation, we identified 58 to 78  
31 MAX effector genes per genome in a set of 120 isolates representing seven host-associated lineages. The  
32 expression of MAX effector genes was primarily restricted to the early biotrophic phase of infection and  
33 strongly influenced by the host plant. Pangenome analyses of MAX effectors demonstrated extensive  
34 presence/absence polymorphism and identified gene loss events possibly involved in host range  
35 adaptation. However, gene knock-in experiments did not reveal a strong effect on virulence phenotypes  
36 suggesting that other evolutionary mechanisms are the main drivers of MAX effector losses. MAX  
37 effectors displayed high levels of standing variation and high rates of non-synonymous substitutions,  
38 pointing to widespread positive selection shaping the molecular diversity of MAX effectors. The  
39 combination of these analyses with structural data revealed that positive selection acts mostly on residues  
40 located in particular structural elements and at specific positions. Our work provides unique insights into  
41 the evolutionary history of an extended fungal effector family and opens up new research avenues to  
42 deepen our understanding of the molecular coevolutionary interactions of fungi with plant hosts.

43

44

45 **AUTHOR SUMMARY**

46 Fungal plant pathogens use small secreted proteins, called effectors, to manipulate to their own advantage  
47 their host's physiology and immunity. The evolution of these effectors, whether spontaneously or in  
48 response to human actions, can lead to epidemics or the emergence of new diseases. It is therefore crucial  
49 to understand the mechanisms underlying this evolution. In this article, we report on the evolution of  
50 effectors in one of the prime experimental model systems of plant pathology, the fungus causing blast  
51 diseases in rice, wheat, and other cereals or grasses. We identify a particular class of effectors, the MAX  
52 effectors, using structural models based on experimental protein structures of effectors previously shown  
53 to have a major role in fungal virulence. We show that this class of effector is produced by the pathogen  
54 during the early stages of infection, when plant cells are still alive. By comparing the gene content of  
55 isolates infecting different plant species, we show that the MAX effector arsenal is highly variable from  
56 one isolate to another. Finally, using the inferential framework of population genetics, we demonstrate  
57 that MAX effectors exhibit very high genetic variability and that this results from the action of natural  
58 selection.

59

60

61

62

## 63 INTRODUCTION

64 Plant pathogens secrete effector proteins to manipulate the physiology and metabolism of their host and  
65 to suppress its immunity. Consequently, effectors are expected to engage in coevolutionary interactions  
66 with plant defense molecules. The proximate mechanisms of effector-driven adaptation are relatively  
67 well-characterized: plant pathogens adapt to new hosts through changes in effector repertoires and  
68 effector sequences [1, 2]. However, the ultimate (eco-evolutionary) mechanisms underlying effector  
69 diversification have remained elusive. The concept of coevolution posits that adaptation in one partner  
70 drives counter-adaptations in the coevolving partner [3-5]. Under the co-evolutionary arms race model,  
71 variation for disease resistance and pathogen virulence is transient, resulting in a turnover of sequence  
72 variation through repeated episodes of strong directional selection [6]. In agricultural systems, because  
73 pathogens tend to be ahead of their hosts in the arms race owing to their larger populations and shorter  
74 generation times, the co-evolutionary arms race tends to result in so-called boom and bust cycles [7].  
75 Under the alternative, ‘trench warfare’ hypothesis, advances and retreats of resistance or virulence genes  
76 frequencies maintain variation as dynamic polymorphisms [8, 9]. The maintenance of genetic  
77 polymorphisms is called ‘balancing selection’, a process by which different alleles or haplotypes are  
78 favored in different places (via population subdivision) and/or different times (via frequency-dependent  
79 negative selection). While there is a growing body of data demonstrating the nature and prevalence of  
80 the selective pressures that shape the diversity of immune systems in plants [6, 10-12], we still lack a  
81 clear picture of the co-evolutionary mechanisms underlying the molecular evolution of virulence factors  
82 in their interacting antagonists [13].

83         Effectors from plant pathogenic fungi are typically cysteine-rich secreted proteins smaller than  
84 200 amino acids with an infection-specific expression pattern. Effectors are numerous in fungal genomes  
85 (several hundred to more than a thousand per genome), and rarely show homologies with known proteins  
86 or domains. They are also highly variable in sequence and do not form large families of sequence  
87 homologs. Based on similarity analyses, fungal effectors can form small groups of paralogs (typically  
88 with less than five members), but they are most often singletons. This apparent lack of larger effector  
89 families has hindered attempts to probe into the evolutionary factors underlying their diversification. In  
90 addition, the high diversity of fungal effectors has hampered functional analyses due to the lack of good

91 criteria for prioritizing them and our inability to predict their physiological role. Consequently, the  
92 virulence function and evolutionary history of most fungal effectors remain unknown.

93         Recently, the resolution of the three-dimensional (3D) structure of fungal effectors combined  
94 with Hidden Markov Model (HMM) pattern searches and structure modeling revealed that fungal effector  
95 repertoires are, despite their hyper-variability, dominated by a limited number of families gathering  
96 highly sequence-diverse proteins with shared structures and, presumably, common ancestry [14-17]. One  
97 such structurally-conserved but sequence-diverse fungal effector family is the MAX (*Magnaporthe Avr*s  
98 and ToxB-like) effector family. MAX effectors are specific to ascomycete fungi and show massive  
99 expansion in *Pyricularia oryzae* (synonym: *Magnaporthe oryzae*) [17], the fungus causing rice blast  
100 disease, one of the most damaging diseases of rice [18, 19]. MAX effectors are characterized by a  
101 conserved structure composed of six  $\beta$ -strands organized into two antiparallel  $\beta$ -sheets that are stabilized  
102 in most cases by one or two disulfide bridges. The amino acid sequence of MAX effectors is very diverse  
103 and they generally have less than 15% identity, which makes them a family of analogous, not homologous  
104 effectors. MAX effectors are massively expressed during the biotrophic phase of infection, suggesting an  
105 important role in disease development and fungal virulence [17]. Remarkably, about 50% of the known  
106 avirulence (AVR) effectors of *P. oryzae* belong to the MAX family, indicating that these effectors are  
107 closely monitored by the host plant immune system [17].

108         *Pyricularia oryzae* is a multi-host, poly-specialist pathogen that infects more than 50  
109 monocotyledonous plants, including major cereal crops such as rice, maize, wheat, or barley [20-23].  
110 *Pyricularia oryzae* has repeatedly emerged on new hosts [21, 24], in new geographical areas [25, 26], and  
111 phylogenomic analyses have revealed that it can be subdivided into several genetic lineages, each  
112 preferentially associated with a specific or restricted set of host plant genera [27]. In *P. oryzae*, effectors  
113 can play a major role in host-shifts or host-range expansions [28-30]. For example, loss of function of the  
114 PWT3 effector in *Lolium*-infecting strains contributed to gain of virulence on wheat [29]. Similarly, loss  
115 of the MAX effector AVR1-CO39 is thought to have contributed to the emergence of rice blast from  
116 foxtail-millet infecting isolates [20, 31]. This indicates that MAX effectors may be important  
117 determinants of host specificity in *P. oryzae*.

118           In this study, we characterized the genetic diversity of MAX effectors in *P. oryzae* and within its  
119 different host-specific lineages. We explored the evolutionary drivers of the diversification of MAX  
120 effectors and tested whether MAX effectors represent important determinants of *P. oryzae* host  
121 specificity. To this aim, we assembled and annotated 120 high-quality *P. oryzae* genomes from isolates  
122 representing seven main host-specific lineages. We mined these genomes for putative effectors and used  
123 hidden Markov models based on fold-informed protein alignments to annotate putative MAX effectors.  
124 We identified 58 to 78 putative MAX effector genes per individual genome distributed in 80 different  
125 groups of MAX homologs. We showed that the expression of MAX effector genes is largely restricted to  
126 the early biotrophic phase of infection and strongly influenced by the host plant. Our evolutionary  
127 analyses showed that MAX effectors harbor more standing genetic variation than other secreted proteins  
128 and non-effector genes, and high rates of non-synonymous substitutions, pointing to positive selection  
129 as a potent evolutionary force shaping their sequence diversity. Pangenome analyses of MAX effectors  
130 demonstrated extensive presence/absence polymorphism and identified several candidate gene loss  
131 events possibly involved in host range adaptation. Our work demonstrates that MAX effectors represent  
132 a highly dynamic compartment of the genome of *P. oryzae*, likely reflecting intense co-evolutionary  
133 interactions with host molecules.

## 134 RESULTS

### 135 *Genome assembly and prediction of MAX effector genes.*

136 We assembled the genomes of a worldwide collection of 120 haploid isolates of *Pyricularia oryzae* fungi  
137 from 14 host genera: *Oryza* (n=52), *Triticum* (n=21), *Lolium* (n=12), *Setaria* (n=8), *Eleusine* (n=8),  
138 *Echinochloa* (n=4), *Zea* (n=4), *Bromus* (n=2), *Brachiaria* (n=2), *Festuca* (n=2), *Stenotaphrum* (n=2),  
139 *Eragrostis* (n=1), *Hordeum* (n=1), and *Avena* (n=1) (S1 Table). Assembly size ranged from 37Mb to  
140 43.2Mb, with an average size of 40.2 Mb (standard deviation [s.d.]: 1.9Mb). L50 ranged from five to 411  
141 contigs (mean: 97.1; s.d.: 83.2) and N50 from 28Kb to 4.0Mb (mean: 238.6Kb; s.d.: 43.8Kb; S1 Table). Gene  
142 prediction based on protein sequences from reference 70-15 and RNAseq data identified 11,520 to 12,055  
143 genes per isolate (mean: 11,763.2; s.d.: 103.7). The completeness of assemblies, as estimated using BUSCO  
144 [32], ranged between 93.4 and 97.0% (mean: 96.4%; s.d.: 0.6%; S1 Table).

145 MAX effectors were identified among predicted secreted proteins using a combination of  
146 similarity searches [33, 34] and structure-guided alignments [35] as summarized in Figure 1. To assess  
147 variation in the MAX effector content of *P. oryzae*, we constructed groups of homologous genes (i.e.,  
148 “orthogroups” or OG) using the clustering algorithm implemented in ORTHOFINDER [36]. A given  
149 orthogroup was classified as secreted proteins or MAX effectors if 10% of sequences in the group were  
150 identified as such by functional annotation. Sequences were grouped in 14,767 orthogroups, of which 80  
151 were classified as encoding MAX effectors, and 3,283 as encoding other types of secreted proteins (Figure  
152 1). The number of MAX orthogroups per isolate ranged from 58 to 73 (average: 65.8; s.d.: 2.8),  
153 representing between 58 to 78 MAX genes per isolate (average: 68.4; s.d.: 3.6). The 80 orthogroups of  
154 MAX effectors were further split into 94 groups of orthologs, by identifying paralogs using gene  
155 genealogies inferred with RAXML v8 [37] (S2 Table).

156

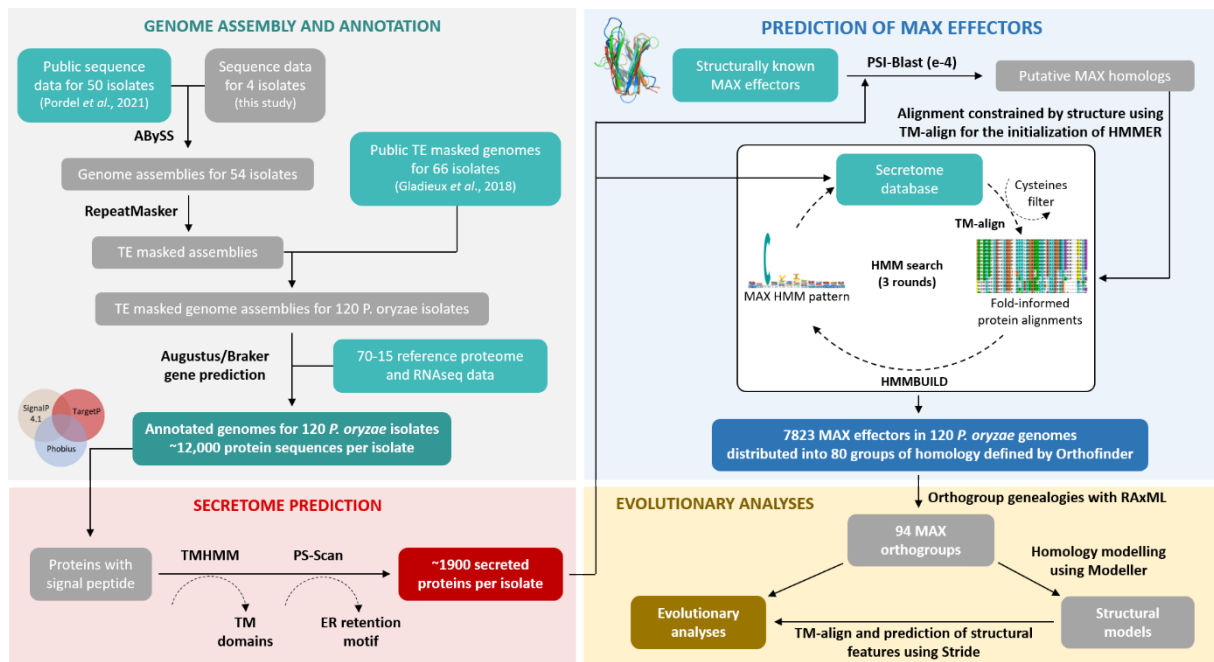

157

158 Figure 1. Schematic representation of the key steps of the bioinformatic pipeline used to predict genes in 120 genomes of  
 159 *Pyricularia oryzae*, and to identify genes encoding MAX effectors. References: Gladieux et al. 2018 [27]; Pordel et al. 2021 [21].

160

161 *Expression of MAX effector genes during rice infection.*

162 To determine whether these putative MAX effectors are deployed by *P. oryzae* during plant infection, we  
 163 analyzed the expression patterns of the 67 *MAX* genes predicted in the genome of the reference isolate  
 164 Guy11 by qRT-PCR (Figure 2A). Using RNA samples from Guy11 mycelium grown on artificial media,  
 165 we found that 94% of the *MAX* genes (63 genes) were not, or very weakly expressed during axenic culture,  
 166 and only four (i.e., *MAX24*, *MAX29*, *MAX59*, and *MAX66*) showed weak, medium or strong constitutive  
 167 expression (Figure 2A). *MAX* genes were, therefore, predominantly repressed in the mycelium of *P.*  
 168 *oryzae*.

169 Following spray inoculation of Guy11 on the rice cultivar Maratelli, which is highly susceptible  
 170 to *P. oryzae*, 67% of the *MAX* genes (45 genes) were expressed (Figure 2A). Among them, three were also  
 171 expressed in the mycelium (i.e., *MAX31*, *MAX59*, and *MAX94*). *MAX31* was over-expressed under  
 172 infection conditions, whereas the other two showed similar levels of expression *in vitro* and during  
 173 infection. 64% of the *MAX* genes (42 genes) showed an infection-specific expression profile with relative  
 174 expression levels ranging from very low (0.008-0.04) to very high (>5). Like the *Bas3* gene, encoding a *P.*



175 *oryzae* effector specifically induced during the biotrophic phase of infection, all *MAX* genes showed  
176 maximal expression between the second and fourth day post-inoculation (Figure 2A; S1 Figure).

177 To test whether the genotype of the host plant could influence the expression of *MAX* genes, we  
178 analyzed their expression patterns upon infection of the rice cultivar Kitaake, which has a higher basal  
179 resistance to *P. oryzae* than Maratelli (Figure 2A; Figure 2B). During Kitaake infection, 78% of the *MAX*  
180 genes (52 genes) were upregulated compared to the *in vitro* condition, while only 64% (43 genes) were  
181 induced upon infection of Maratelli (Figure 2A). Some *MAX* genes not expressed in Maratelli were  
182 induced in Kitaake (e.g., *MAX24*, *MAX30*, *MAX32*, *MAX43*, *MAX71*, and *MAX73*) (Figure 2B, S2 Figure).  
183 Others were significantly upregulated in Kitaake compared to Maratelli (i.e., *MAX22*, *MAX44*, *MAX55*,  
184 *MAX57*, *MAX69*, and *MAX91*). However, a few genes, such as *MAX15*, *MAX37* and *MAX62*, among the  
185 most strongly expressed effectors in Maratelli, showed weaker levels of expression in Kitaake. These  
186 results show that Guy11 deploys a wider diversity of *MAX* effectors during the infection of Kitaake  
187 compared to that of Maratelli, and that *MAX* effectors are subject to host-dependent expression  
188 polymorphism.

189 Taken together, our data revealed that during the biotrophic phase of rice infection, *P. oryzae*  
190 massively deploys *MAX* effectors in a plastic manner suggesting that they have an important function in  
191 fungal virulence.

192

193

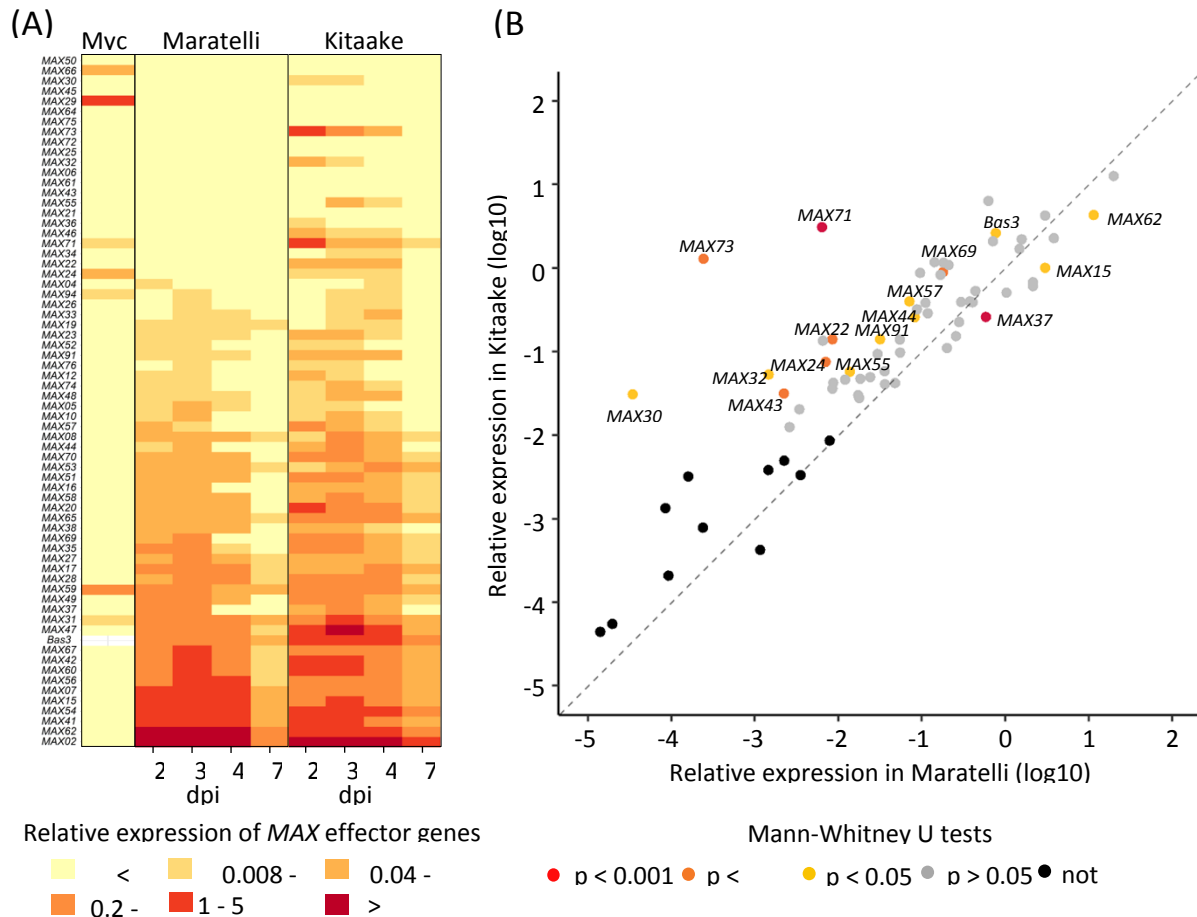

194

195 Figure 2. The expression of *MAX* genes is biotrophy-specific and is influenced by the host plant. (A) Transcript levels of *MAX*  
 196 genes and the biotrophy marker gene *Bas3* were determined by qRT-PCR in the mycelium (Myc) of the *P. oryzae* isolate Guy11  
 197 grown for 5 days in liquid culture, and in infected leaves of the rice cultivars Maratelli and Kitaake at 2, 3, 4, and 7 days post  
 198 inoculation (dpi) with Guy11. Relative expression levels were calculated using the constitutively expressed *MoEF1α* (*Elongation*  
 199 *Factor 1α*) gene as a reference. The heatmap shows the median relative expression value for each gene (in log<sub>2</sub> scale), calculated  
 200 from 6 independent biological samples for the Myc condition, and 3 independent inoculation experiments (each with 5  
 201 independent leaf samples per time point) for each rice cultivar. Effectors were ranked from top to bottom by increasing relative  
 202 expression values in Maratelli. Relative expression values were assigned to six categories: not expressed (<0.008), very weakly  
 203 (0.008-0.04), weakly (0.04-0.2), moderately (0.2-1), strongly (1-5) and very strongly expressed (>5). (B) Scatter plot comparing  
 204 the relative expression levels of MAX genes in Guy11-infected Maratelli and Kitaake cultivars. Each point shows the maximum  
 205 median relative expression value (in log<sub>10</sub> scale) calculated in the infection kinetics described in (A). Difference in effector  
 206 relative expression levels between the two conditions was assessed by Mann-Whitney U tests and dots were colored according  
 207 to significance results: grey ( $p > 0.05$ ), yellow ( $p < 0.05$ ), orange ( $p < 0.001$ ), red ( $p < 0.0001$ ), black (effectors not expressed in both  
 208 conditions).

209

210

211 *Variability of the MAX effector repertoire.*

212 To investigate the genetic diversity of MAX effectors in *P. oryzae*, we analyzed their nucleotide diversity  
213 per base pair ( $\pi$ ), their ratio of non-synonymous to synonymous nucleotide diversity ( $\pi_N/\pi_S$ ), and their  
214 presence-absence polymorphism. Compared to other secreted proteins or other genes, MAX effector  
215 orthogroups had higher  $\pi$ , and  $\pi_N/\pi_S$  values, and lower presence frequency (S3 Figure). Orthogroups  
216 including known avirulence genes like *AVR1-CO39*, *AvrPiz-t* and *AVR-Pik* featured among the most  
217 diverse orthogroups of MAX effectors (S1 Data).

218 We categorized genes in the pangenome according to their presence frequencies [38], with core  
219 genes present in all isolates, softcore genes present in >99% isolates, cloud genes present in 1-99% isolates  
220 and shell genes present in <1% isolates. The majority of MAX effector genes were classified as cloud  
221 (64/80 [80%] orthogroups), while the majority of other secreted proteins or other genes were classified as  
222 core or softcore (1650/3283 [50.2%] and 6714/11404 [58.9%] orthogroups, respectively) (Figure 3A). Only  
223 a minority of genes were present in multiple copies (MAX: 15/80 [18.8%]; other effectors: 746/3283  
224 [22.7%]; other genes: 1439/11404 [12.6%]; Figure 3A). Assessment of the openness of the pan-genome by  
225 iteratively subsampling isolates revealed a closed pangenome with a limited number of pan and core  
226 genes for MAX effectors, other secreted proteins and the remainder of the gene space (Figure 3B).  
227 Nucleotide diversity differed significantly between categories of the pangenome for non-MAX effectors  
228 (Kruskal-Wallis test:  $H=181.17$ , d.f.=2,  $p<0.001$ ) and other genes (Kruskal-Wallis test:  $H=225.25$ , d.f.=2,  
229  $p<0.001$ ), but not for MAX effectors (Kruskal-Wallis test:  $H=2.50$ , d.f.=2,  $p>0.05$ ). For non-MAX effectors  
230 and other genes, nucleotide diversity  $\pi$  was significantly higher in the cloud genes than in softcore genes  
231 and core genes (Post-hoc Mann-Whitney U-tests,  $p<0.001$ ; Figure 3C).

232 Together, these analyses show that the MAX effector repertoire is highly plastic compared to  
233 other gene categories, both in terms of the presence/absence of orthogroups and the sequence variability  
234 within orthogroups.

235

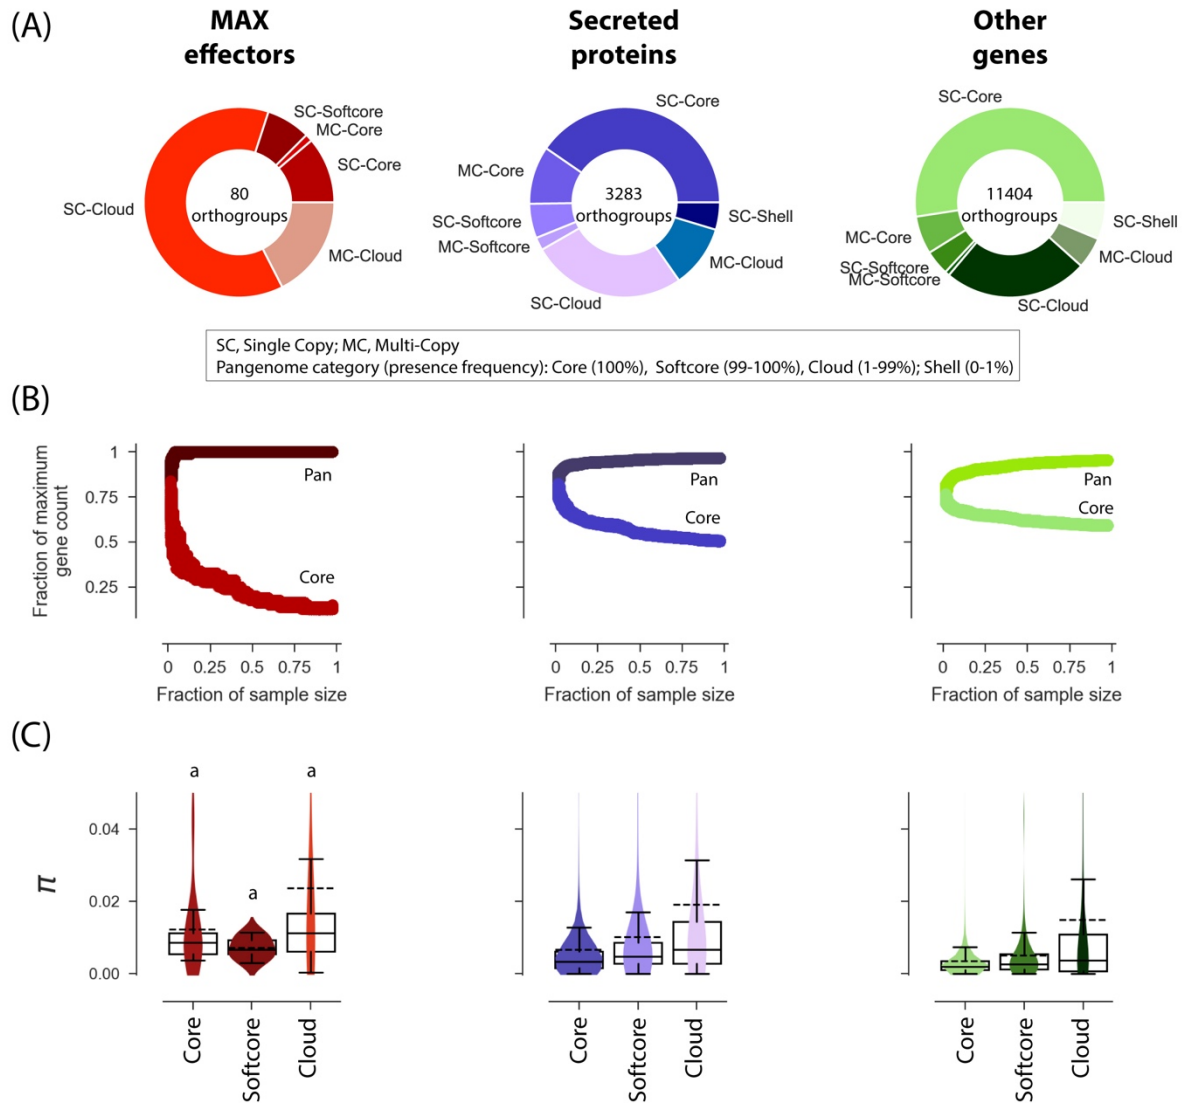

236

237 Figure 3. The pan-genome of *P. oryzae*. (A) Composition of the pangenome of MAX effectors, other secreted proteins, and other

238 genes. (B) Rarefaction analysis of the size of pan- and core-genomes. For  $k$  ranging from two to the sample size minus one, pan-

239 and core-genome sizes were computed for 1000 random combinations of  $k$  isolates. Subsample size is represented as a fraction

240 of the sample size ( $n=121$ ), and pan- and core-genome sizes as a fraction of maximum gene counts (reported at the center of

241 donut plots in panel A). “core” genes are present in all isolates of a pseudo-sample of size  $k$ ; “pan” qualifies genes that are not

242 “core”. (C) Nucleotide diversity per base pair ( $\pi$ ) in core, softcore, and cloud genes. A number of data points were cropped from

243 the nucleotide diversity plot for visually optimal presentation but included in statistical tests. In box plots, the dashed black line

244 is the mean, the solid black line is the median. Shell genes were not included in the nucleotide diversity plot because it was not

245 computable due to the small sample size or lack of sequence after filtering for missing data. Shared superscripts indicate non-

246 significant differences (Post-hoc Mann-Whitney U-tests).

247

248 *Population subdivision.*

249 To investigate signatures of positive selection in the genome of *P. oryzae*, and identify candidate loci  
250 involved in host specificity, we first identified the divergent lineages represented in our dataset. We  
251 inferred population structure from 5.04e5 SNPs in single-copy core orthologs, using complementary  
252 approaches that make no assumption about random mating or linkage equilibrium. Both clustering  
253 analyses with the SNMF software [38] (Figure 4A) and neighbor-net phylogenetic networks [39] (Figure  
254 4B) revealed consistent patterns that split genetic variation primarily by host of origin, with seven major  
255 lineages mainly associated with rice (*Oryza*), foxtail millet (*Setaria*), wheat (*Triticum*), ray-grass (*Lolium*),  
256 goosegrass (*Eleusine*), barnyard grass and maize (*Echinochloa* and *Zea*), and St. Augustine grass  
257 (*Stenotaphrum*).

258 Population subdivision inferred from MAX effectors using either 130 SNPs without missing data  
259 in single-copy core MAX effectors (Figure 4C) or presence/absence variation of all 80 MAX effector  
260 orthogroups (Figure 4D) revealed essentially the same groups as the analysis of the single-copy core  
261 orthologs. This indicates that genome-wide nucleotide variation, variation in MAX effector content, and  
262 nucleotide variation at MAX effectors reflected similar genealogical processes. The *Oryza* and *Setaria*  
263 lineages displayed exceptionally high presence/absence variation of MAX effectors (average Hamming  
264 distance between pairs of isolate: 0.123 and 0.095; Figure 4D), but only limited sequence variation at  
265 single copy core MAX effectors (average Hamming distance between pairs of isolate: 0.017 and 0.012;  
266 Mann-Whitney U-tests,  $p < 0.05$ ; Figure 4C).

267 Population subdivision was also apparent at the level of the global characteristics of genomes.  
268 Assembly size differed significantly among lineages (Kruskal-Wallis test:  $H=72.9$ , d.f.=4,  $p < 0.0001$ ), and  
269 genome assemblies for the *Oryza*-infecting lineage, in particular, were significantly shorter than  
270 assemblies from other groups (Post-hoc Mann-Whitney U-tests,  $p < 0.001$ ; S4 Figure). The number of  
271 predicted genes, which was positively and significantly correlated with assembly size (Spearman's  
272  $\rho=0.31$ ,  $p < 0.001$ ), also differed significantly among lineages and was the highest in the *Lolium*-infecting  
273 lineage and the lowest in the *Eleusine*-infecting lineage (Kruskal-Wallis test:  $H=19.4$ , d.f.=4,  $p < 0.0001$ ;  
274 S4 Figure). The distribution of the number of orthogroups in lineages was largely similar to the

275 distribution of the number of genes, with more orthogroups in the *Lolium*-infecting lineage and fewer in  
 276 the *Eleusine*-infecting lineage (S4 Figure).

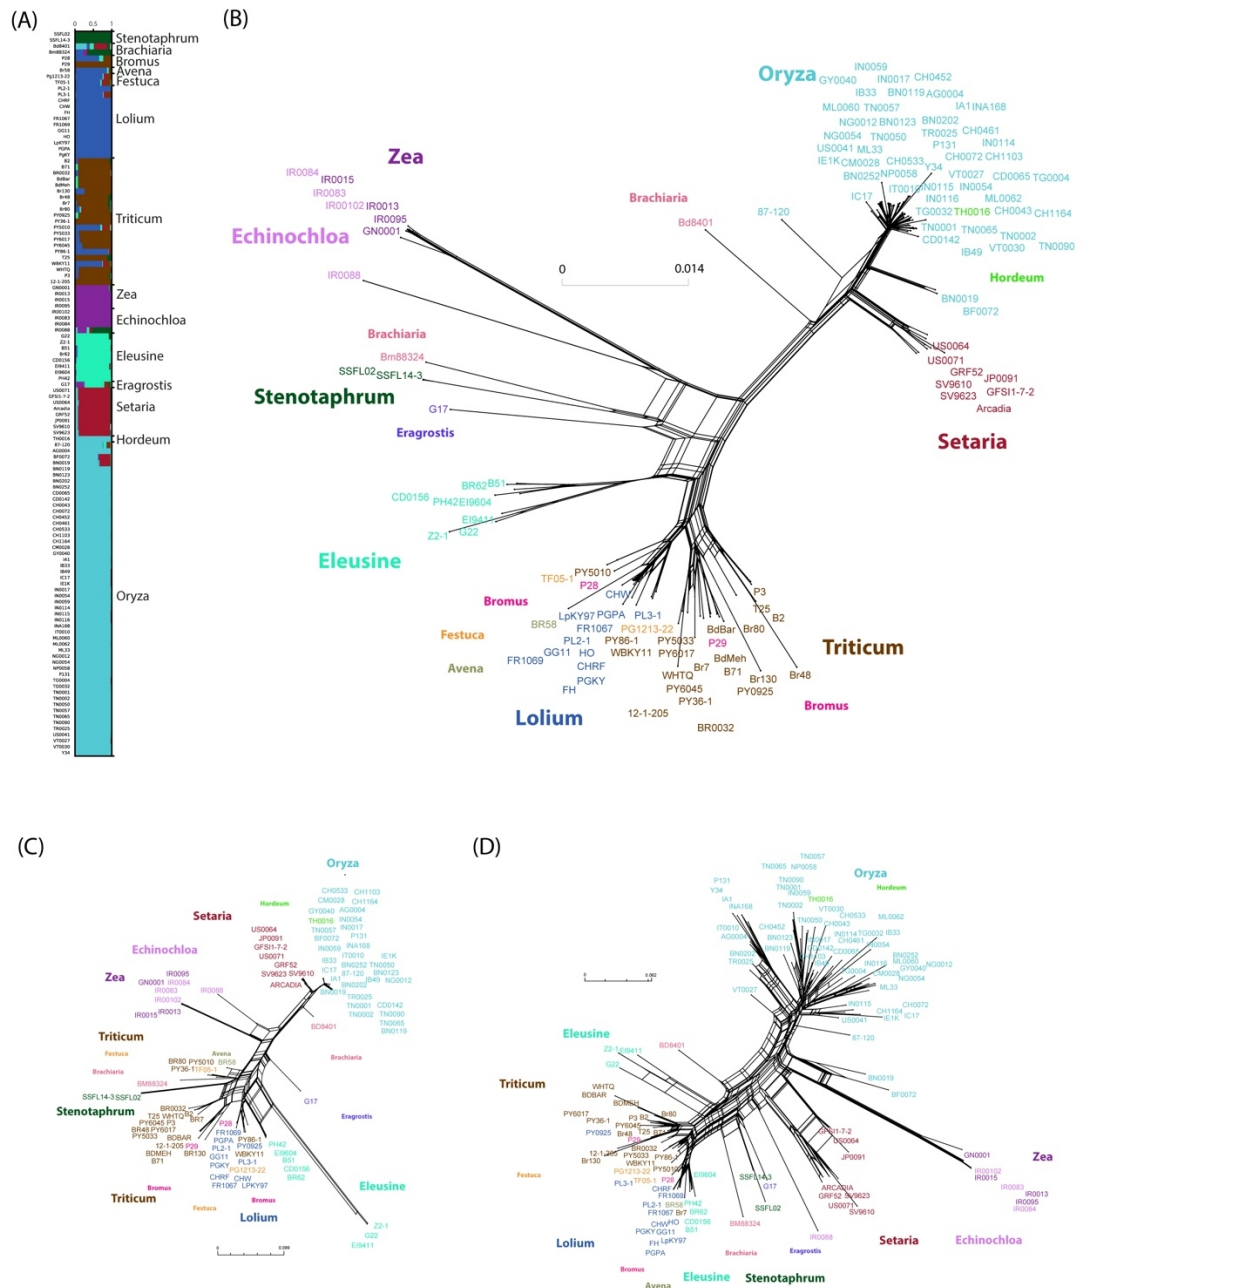

277  
 278 Figure 4. Population subdivision in 120 isolates of *Magnaporthe oryzae*. Population subdivision was inferred from (A-B) 5.04e5  
 279 single nucleotide polymorphisms (SNPs) without missing data identified in coding sequences of single-copy core orthologs, (C)  
 280 130 SNPs without missing data identified in coding sequences of single-copy core MAX effectors, (D) a table of presence/absence  
 281 data (coded as 0 and 1) for all 80 MAX effector orthogroups. (A) Genetic ancestry proportions for individual isolates in K=7  
 282 ancestral populations, as estimated using the sNMF clustering algorithm [38]; each isolate is depicted as a horizontal bar divided  
 283 into K segments representing the proportion of ancestry in K=7 inferred ancestral populations; host genus of origin is indicated  
 284 on the right side. (B-D) Neighbor-net phylogenetic networks estimated with SPLITS TREE [39], with isolate names colored

285 according to their host of origin. In (C), haplotypes repeated multiple times were represented by the first items in the following  
286 lists: (BN0252, CD0065, CH0043, CH0072, CH0452, CH0461, IN0114, IN0115, IN0116), (IB33, ML0060, ML0062, ML33, NG0054,  
287 NP0058, TG0004, TG0032, US0041, VT0027, VT0030), (TR0025, Y34), (CHRF, HO, LPKY97, P28).

288  
289 *Loss of MAX effectors in specific lineages does not necessarily associate with host specificity.*

290 The comparison of the MAX effector content in the genomes of 120 *P. oryzae* isolates revealed extensive  
291 presence/absence polymorphism between host-specific groups (S3 Table). To address the underlying  
292 evolutionary mechanisms, we tested experimentally the hypothesis that MAX effector losses are  
293 massively related to escape from receptor-mediated non-host resistance. Indeed, the loss of MAX  
294 effectors in specific lineages of *P. oryzae* could primarily serve to escape from non-host resistance during  
295 infections of novel plant species carrying immune receptors specifically recognizing these effectors. To  
296 test this hypothesis, we focused on the *Oryza*- and *Setaria*-infecting lineages, as previous investigations  
297 suggested that the *Oryza*-infecting lineage emerged by a host shift from *Setaria* and we found both groups  
298 to be closely related (Figure 4) [21, 40]. Our strategy was to introduce into the *Oryza*-isolate Guy11 MAX  
299 effectors absent from the *Oryza* lineage but present in the *Setaria* lineage, and to assess the ability of  
300 these transgenic isolates to infect rice.

301 We identified three MAX orthogroups that were largely or completely absent from the *Oryza*  
302 lineage, but present in the majority of isolates of the other lineages (S3 Table). Orthogroup MAX79  
303 (OG0011591-1) was absent in all 52 *Oryza*-infecting isolates, while MAX83 (OG0011907), and MAX89  
304 (OG0012141) were absent in 50 and 46 of them, respectively (S3 Table). Constructs carrying the genomic  
305 sequence of *MAX79*, *MAX83* or *MAX89* derived from the *Setaria* isolate US0071 and under the control  
306 of the strong infection specific promoter of the effector *AVR-Pia* were generated and stably introduced  
307 into Guy11. For each construct, three independent transgenic lines were selected. Transgene insertion  
308 was verified by PCR and the expression of transgenes was measured by qRT-PCR (S5 Figure). To test  
309 whether the selected MAX effectors trigger immunity in rice, the transgenic isolates were spray-  
310 inoculated onto a panel of 22 cultivars representative of the worldwide diversity of rice (S4 Table).

311 As controls, we used the MAX effectors *AVR-Pia*, which is rare outside the *Oryza* and *Setaria*  
312 lineages, and *AVR1-CO39*, which is absent or pseudogenized in the *Oryza* lineage, but present in all other  
313 host-specific lineages including *Setaria*. Both effectors are detected in rice by the paired NLR immune

314 receptors RGA4 and RGA5 from the *Pi-a/Pi-CO39* locus and thereby contribute, respectively, to host or  
315 non-host resistance in this plant species [41, 42].

316 As expected, isolates expressing *AVR1-CO39* or *AVR-Pia* triggered resistance in the rice variety  
317 Aichi Asahi that carries *Pi-a*, but caused disease on Nipponbare (*pi-a*) and other varieties lacking this *R*  
318 locus (Figure 5; S4 Table). Unlike the positive controls, the effectors MAX79, MAX83 and MAX89 were  
319 not recognized and did not induce resistance in any of the tested rice cultivars (Figure 5; S4 Table). The  
320 disease symptoms caused by the transgenic isolates carrying these effectors were similar to those  
321 observed for wild-type Guy11 or Guy11 isolates carrying an *RFP*(red fluorescent protein) construct. This  
322 suggests that these effectors do not significantly increase the virulence of Guy11.

323 These experiments show that despite their loss in the *Oryza*-infecting lineage of *P. oryzae*, and  
324 unlike *AVR1-CO39*, the effectors MAX79, MAX83, and MAX89 do not seem to induce non-host  
325 resistance in rice. Consequently, other mechanisms than escape from host immunity contributed to the  
326 loss of these MAX effectors during the putative host shift of *P. oryzae* from *Setaria* to *Oryza*.

327



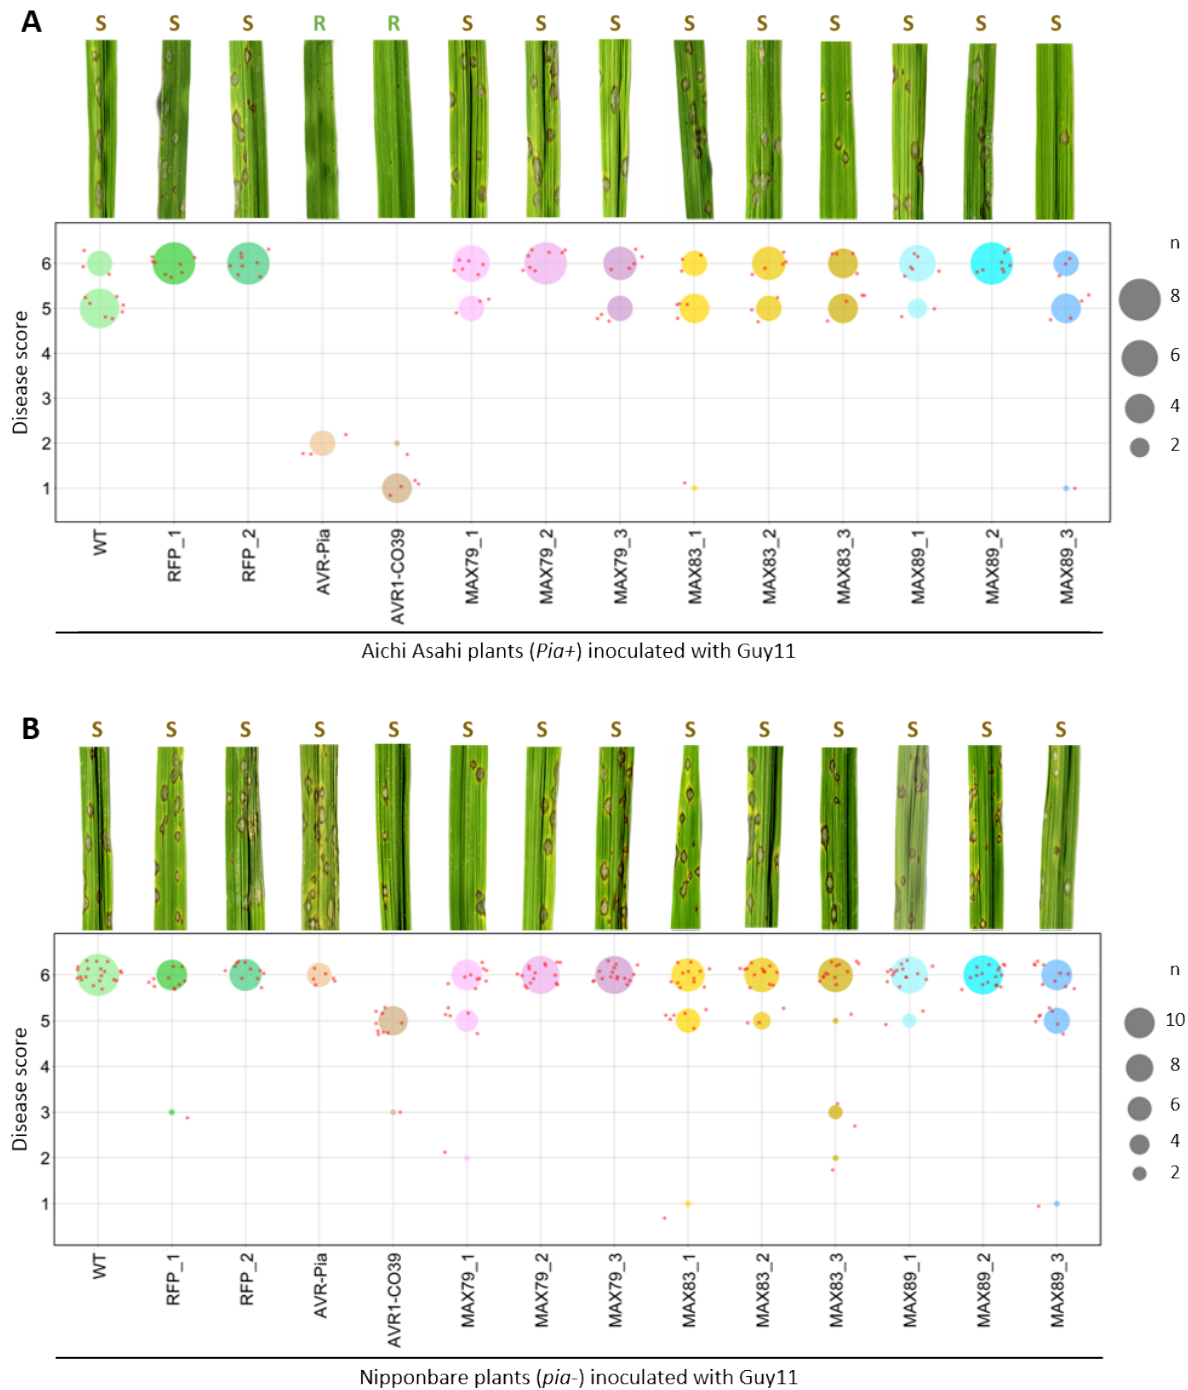

328 Figure 5. AVR1-CO39 contributes to non-host specificity in rice but not MAX79, MAX83 or MAX89. Wild type and  
 329 transgenic isolates of *P. oryzae* Guy11 expressing the *RFP* (red fluorescent protein), *AVR-Pia*, *AVR1-CO39*, *MAX79*, *MAX83*  
 330 or *MAX89* gene were spray-inoculated at 40 000 spores/ml on three-week-old rice plants of the cultivars Aichi Asahi (A) and  
 331 Nipponbare (B). For each condition, representative disease phenotypes on rice leaves at seven days post-inoculation are shown  
 332 (top panels, R: resistance, S: susceptibility). Disease phenotypes were also scored (from 1 [complete resistance] to 6 [high  
 333 susceptibility]) on leaves from 3 to 5 individual rice plants and data are shown as dot plots (bottom panels). The size of each  
 334 circle is proportional to the number of replicates (n) matching the corresponding score for each condition. Small red dots  
 335 correspond to individual measurements. The experiment was performed twice for Aichi Asahi and four times for Nipponbare

336 for all isolates except for WT, AVR-Pia, and AVR1-CO39 control isolates. For these isolates, experiments were performed  
337 once on Aichi Asahi and twice on Nipponbare because disease phenotypes are well characterized in the literature.

338

### 339 *Signatures of balancing selection at MAX effectors.*

340 To investigate the impact of balancing selection on MAX effector evolution, we focused on single-copy  
341 core, softcore, and cloud orthogroups to avoid the possible effect of gene paralogy. We then computed  $\pi$   
342 (nucleotide diversity per bp),  $F_{ST}$  (the amount of differentiation among lineages [43]),  $\pi_N$  (non-  
343 synonymous nucleotide diversity),  $\pi_S$  (synonymous nucleotide diversity), and  $\pi_N/\pi_S$  (the ratio of non-  
344 synonymous to synonymous nucleotide diversity). Large values of  $\pi$  and  $\pi_N/\pi_S$ , in particular, are possible  
345 indicators of a gene being under balancing selection.

346 Nucleotide diversity ( $\pi$ ) differed significantly between groups of genes (Kruskal-Wallis test,  
347  $H=509.9$ ,  $d.f.=2$ ,  $p<0.001$ ; Figure 6A; S5 Table).  $\pi$  was significantly higher for the set of MAX effectors  
348 (average  $\pi$ : 0.0104, standard deviation: 0.0137), than for other secreted proteins (average  $\pi$ : 0.0079,  
349 standard deviation: 0.020), and other genes (average  $\pi$ : 0.0049, standard deviation: 0.014; Mann-Whitney  
350 U-tests,  $p<0.05$ ), showing that MAX effectors, and to a smaller extent other secreted proteins, are more  
351 variable than a typical gene. At the lineage level, however, nucleotide diversity at MAX effectors tended  
352 to not significantly differ from other putative effectors, or other genes (S5 Table).

353 In addition to having greater nucleotide variation than other genes at the species level, MAX  
354 effectors also displayed a higher ratio of non-synonymous to synonymous nucleotide diversity (Figure  
355 6B; S5 Table). The  $\pi_N/\pi_S$  ratio differed significantly between groups of genes (Kruskal-Wallis tests  
356  $H=101.4$ ,  $d.f.=2$ ,  $p<0.001$ ), and the excess of non-synonymous diversity was significantly, and markedly,  
357 higher for MAX effectors (average  $\pi_N/\pi_S$ : 1.826, standard deviation: 3.847) than for other effectors  
358 (average  $\pi_N/\pi_S$ : 0.461, standard deviation: 1.600), and other genes (average  $\pi_N/\pi_S$ : 0.448, standard  
359 deviation: 1.463; Mann-Whitney U-tests,  $p<0.05$ ). The higher  $\pi_N/\pi_S$  of MAX effectors was mostly driven  
360 by differences in  $\pi_N$  (Figure 6A; S5 Table). Twenty MAX effectors displayed values in the top 5%  
361 percentile of non-effector genes, far exceeding the four genes expected by chance ( $p<0.05$ ). More  
362 specifically, 26 MAX effectors displayed  $\pi_N/\pi_S$  values greater than 1, which is the value expected under  
363 neutrality. This included three well-known avirulence genes: *AVR1-CO39* ( $\pi_N/\pi_S=2.564$ ), *AVR-Pik*

364 ( $\pi_N/\pi_S=15.574$ ), and *AvrPiz-t* ( $\pi_N/\pi_S=1.431$ ). The average  $\pi_N/\pi_S$  ratio was also higher at MAX effectors  
365 than other secreted proteins and other genes in all lineages, with significant differences in four lineages  
366 (Mann-Whitney U-tests,  $p<0.05$ ), and the average  $\pi_N/\pi_S$  was greater than one in the *Oryza* lineage (Figure  
367 6B; S5 Table). Seven to eleven MAX effectors had  $\pi_N/\pi_S>1$  at the lineage level, representing 8% (*Setaria*-  
368 infecting lineage) to 41% (*Lolium*-infecting lineage) of MAX effectors with a defined  $\pi_N/\pi_S$  ratio  
369 (*Zea/Echinochloa* lineage excluded, as only three MAX effectors had a defined  $\pi_N/\pi_S$ ; S2 Data).

370  $\pi_N/\pi_S>1$  is a strong indication of multiallelic balancing selection (*i.e.*, multiple alleles at multiple  
371 sites are balanced), as single sites under very strong balancing selection cannot contribute enough non-  
372 synonymous variability to push the  $\pi_N/\pi_S$  ratio above one [44]. To assess whether the adaptation of  
373 lineages to their respective hosts may contribute to the species-wide excess of non-synonymous diversity  
374 detected at MAX effectors, we estimated population differentiation. The differentiation statistic  $F_{ST}$   
375 differed significantly between groups of genes (Kruskal-Wallis tests  $H=8.731$ ,  $d.f.=2$ ,  $p=0.013$ ), and  
376 differentiation was significantly higher for MAX effectors than for other secreted proteins and other  
377 genes (Figure 6A; S5 Table).  $F_{ST}$  was also significantly, albeit relatively weakly, correlated with  $\pi_N/\pi_S$  at  
378 MAX effectors (Spearman's  $\rho$ : 0.304,  $p=0.007$ ; S6 Figure). These observations indicate that between-  
379 lineage differences in allele frequencies are greater for MAX effectors than for other secreted proteins  
380 or other genes, which may result from divergent selection exerted by hosts.

381

382

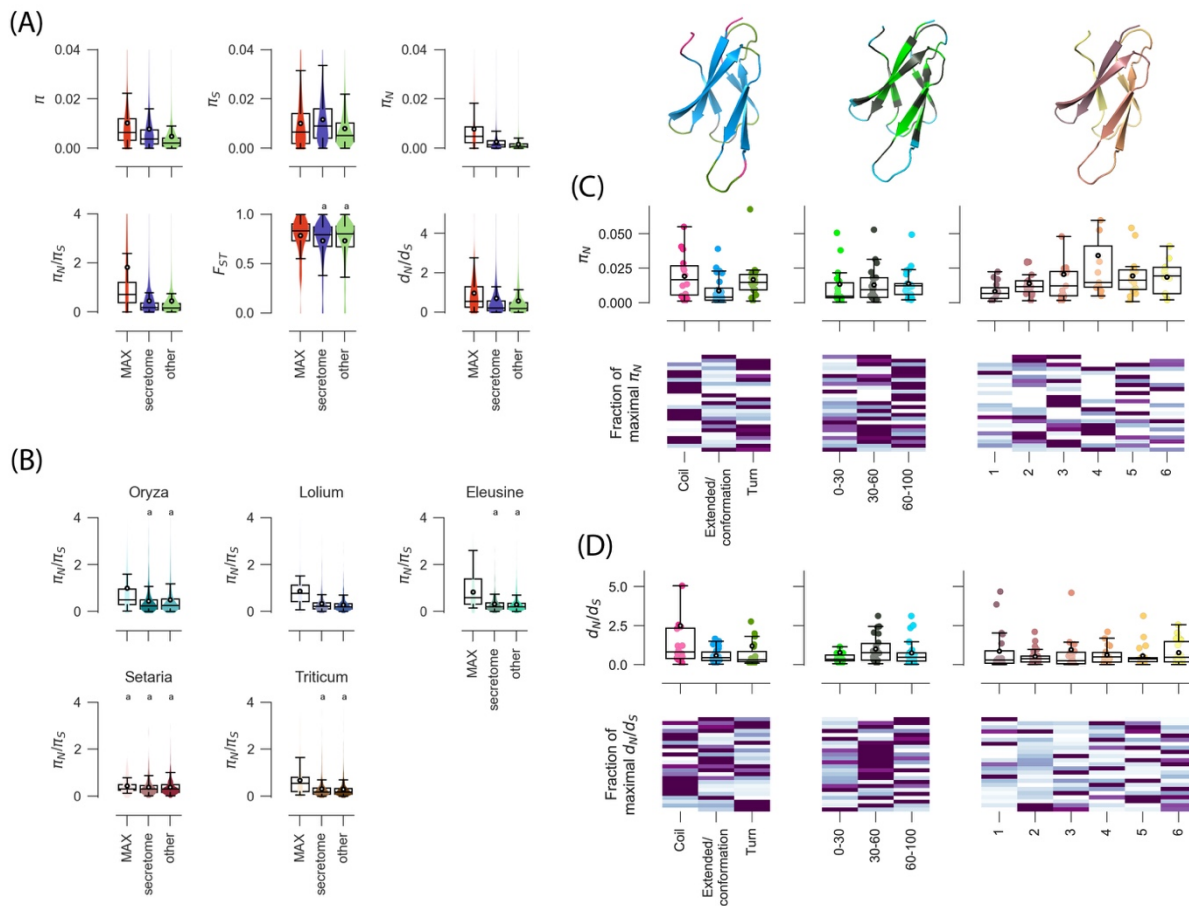

383  
 384  
 385 Figure 6. Summary statistics of polymorphism and divergence at MAX effectors, other secreted proteins (i.e.,  
 386 secretome), and other genes of *P. oryzae*. (A) Species-wide estimates of  $\pi$  (nucleotide diversity per bp),  $F_{ST}$  (the  
 387 amount of differentiation among lineages),  $\pi_N$  (non-synonymous nucleotide diversity per bp),  $\pi_S$  (synonymous  
 388 nucleotide diversity per bp),  $\pi_N/\pi_S$  (the ratio of non-synonymous to synonymous nucleotide diversity),  $d_N/d_S$  (the  
 389 ratio of non-synonymous to synonymous rates of substitutions). (B) Lineage-specific estimates of  $\pi_N/\pi_S$  (C) and  
 390 (D) Species-wide estimates of  $\pi_N$  and  $d_N/d_S$  computed at MAX effectors with signatures of balancing selection  
 391 ( $\pi_N/\pi_S > 1$ ; panel C) and signatures of directional selection ( $d_N/d_S > 1$ ; panel D) for different classes of secondary  
 392 structure annotations highlighted on the three-dimensional structure of *AVR-Piz-t* above panel C: (i) structural  
 393 features, with three subclasses: “extended conformation”, “coils”, and “turns”; (ii) solvent accessibility percentage  
 394 of the Van der Waals surface of the amino acid sidechain, with three sub-classes: 0-30% (buried), 30-60%  
 395 (intermediate), and 60-100% (exposed); (iii) structural domains, with six subclasses that grouped the coil, extended  
 396 conformation and turn residues that define the six beta strands characteristic of MAX effectors. In the heatmaps,  
 397 each line represents a MAX effector. For a given MAX effector and a given structural feature, the darkest color  
 398 indicates the class of the secondary structure annotation for which the summary statistic is the highest. Only single-  
 399 copy core, softcore, and cloud groups of orthologous genes were included in calculations. Shared superscripts  
 400 indicate non-significant differences (post-hoc Mann-Whitney U-tests,  $p > 0.05$ ). A number of data points were  
 401 cropped from plots in (A) and (B) for visually optimal presentation but included in statistical tests. In box plots, the  
 402 black circle is the mean, the black line is the median.

403

404 *Signatures of recurrent directional selection at MAX effectors*

405 To detect adaptive molecular evolution, we collected orthologous sequences from outgroup *Pyricularia*  
406 *sp.* LS [45, 46] and estimated the  $d_N/d_S$  ratio (the ratio of non-synonymous to synonymous substitution  
407 rates) using a maximum likelihood method [47]. Outgroup sequences could be retrieved for 10,174 out of  
408 14,664 single-copy orthogroups, including 66 out of 94 single-copy orthologs of MAX effectors. The  $d_N/d_S$   
409 ratio differed significantly between groups of genes (Kruskal-Wallis tests  $H=45.812$ ,  $d.f.=2$ ,  $p<0.001$ ;  
410 Figure 6A; S5 Table), and was higher for MAX effectors (average  $d_N/d_S$ : 0.977, s.d.: 1.316) than for other  
411 secreted proteins (average  $d_N/d_S$ : 0.711, s.d.: 1.722), and other genes (average  $d_N/d_S$ : 0.584, s.d.: 1.584;  
412 Mann-Whitney U-tests,  $p<0.05$ ). The same pattern of higher  $d_N/d_S$  for MAX effectors was observed at the  
413 lineage level (S5 Table). Twenty-four of the 66 MAX effectors with outgroup sequence (i.e., 36.4%)  
414 showed  $d_N/d_S>1$  (S2 Data), which is a strong indication of directional selection.  $d_N/d_S>1$  is only expected  
415 for genes that have experienced repeated bouts of directional selection which led to repeated fixations of  
416 amino-acid substitutions [44]. Eleven MAX effectors displayed signatures of both multiallelic balancing  
417 selection ( $\pi_N/\pi_S>1$ ) and multiallelic directional selection ( $d_N/d_S>1$ ).

418 The divergence data, therefore, indicate that a scenario of molecular co-evolution involving  
419 repeated selective sweeps may apply to a substantial fraction (at least one-third) of MAX effectors.

420

421 *Structural determinants of polymorphism and divergence at MAX effectors.*

422 Different parts of proteins can be under different selective forces. To investigate the relationships  
423 between the structural properties of MAX effectors and signatures of balancing or directional selection,  
424 we focused on MAX effectors with  $d_N/d_S$  and  $\pi_N/\pi_S$  ratios  $>1$  and we computed  $\pi_N$  and  $d_N/d_S$  for different  
425 classes of secondary structure annotations, as computed by STRIDE from MAX effector structures  
426 predicted by homology modeling for each orthologous group [48] (S7 Figure). We used  $\pi_N$  and not  $\pi_N/\pi_S$   
427 because the latter tended to be undefined due to relatively short sequence lengths. We defined three  
428 classes of secondary structure annotations: (1) structural features, with three subclasses: “extended  
429 conformation”, “coils”, and “turns”; (2) solvent accessibility percentage of the Van der Waals surface of  
430 the amino acid sidechain, with three sub-classes: 0-30% (buried), 30-60% (intermediate), and 60-100%  
431 (exposed); (3) structural domains, with six subclasses that grouped the coil, extended conformation and

432 turn residues that define the six beta strands characteristic of MAX effectors. We used the structure-  
433 guided alignment generated by TM-ALIGN to extract the secondary structure annotations of each amino  
434 acid of the MAX effector sequences (S7 Figure).

435 We found that  $\pi_N$  significantly differed (Kruskal-Wallis tests  $H=8.504$ ,  $d.f.=2$ ,  $p=0.014$ ) between  
436 subclasses of structural features (Figure 6C; S6 Table). In the 25 MAX effectors under multiallelic  
437 balancing selection that passed our filter on sequence length (at least ten sequences longer than 10bp, see  
438 Methods),  $\pi_N$  was significantly higher at coils and turns, than at extended conformations (coils:  
439  $\pi_N=0.0191$ ; turns:  $\pi_N=0.0167$ ; extended conformations:  $\pi_N=0.0086$ ; posthoc Mann-Whitney U-tests,  
440  $p<0.05$ ), and 10 and 9 MAX effectors displayed their highest values of  $\pi_N$  in coils and turns, respectively.  
441  $\pi_N$  did not significantly differ between relative solvent accessibility subclasses (Kruskal-Wallis tests  
442  $H=2.308$ ,  $d.f.=2$ ,  $p=0.315$ ), but differences were marginally significant between structural domains  
443 (Kruskal-Wallis tests  $H=11.035$ ,  $d.f.=5$ ,  $p=0.051$ ). The third, fourth and fifth beta strands displayed the  
444 highest levels of non-synonymous diversity ( $\pi_N=0.0341$ ,  $\pi_N=0.0341$ , and  $\pi_N=0.0341$ , respectively), and 18  
445 out of 25 MAX effectors displayed their highest values of  $\pi_N$  at one of these three beta strands (S6 Table).

446 In the 23 MAX effectors under multiallelic directional selection that passed our filter on sequence  
447 length (at least ten sequences longer than 10bp, see Methods), differences in  $d_N/d_S$  were most pronounced  
448 between subclasses of structural features (Kruskal-Wallis tests  $H=5.499$ ,  $d.f.=2$ ,  $p=0.064$ ), with higher  
449 average  $d_N/d_S$  values for coils and turns ( $d_N/d_S=2.490$  and  $d_N/d_S=1.184$ , respectively) than extended  
450 conformations ( $d_N/d_S=0.573$ ) (Figure 6D; S6 Table). The average  $d_N/d_S$  was also close to one for the 30-  
451 60% subclass of relative solvent accessibility ( $d_N/d_S=0.994$ ), and 12 MAX effectors with signatures of  
452 directional selection had their highest  $d_N/d_S$  values for this subclass, although differences were not  
453 significant.

454 Overall, these analyses show that multiallelic balancing and directional selection acted  
455 preferentially on coils and turns, but that the impact of two forms of selection on structural domains and  
456 solvent accessibility subclasses differs.

457

458

459 **DISCUSSION**

460 *MAX effectors as model systems to investigate effector evolution.*

461 Effectors involved in coevolutionary interactions with host-derived molecules are expected to undergo  
462 non-neutral evolution. Yet, the role of natural selection in shaping polymorphism and divergence at  
463 effectors has remained largely elusive [2]. Despite the prediction of large and molecularly diversified  
464 repertoires of effector genes in many fungal genomes, attempts to probe into the evolutionary drivers of  
465 effector diversification in plant pathogenic fungi have been hindered by the fact that, until recently, no  
466 large effector families had been identified. In this study, we overcome the methodological and conceptual  
467 barrier imposed by effector hyper-diversity by building on our previous discovery [17] of an important,  
468 structurally-similar, but sequence-diverse family of fungal effectors called MAX. We used a combination  
469 of structural modeling, evolutionary analyses, and molecular plant pathology experiments to provide a  
470 comprehensive overview of polymorphism, divergence, gene expression, and presence/absence at MAX  
471 effectors. When analyzed species-wide or at the level of sub-specific lineages, ratios of non-synonymous  
472 to synonymous nucleotide diversity, as well as ratios of non-synonymous to synonymous substitutions,  
473 were consistently higher at MAX effectors than at other loci. At the species level, the two ratios were  
474 also significantly higher than expected under the standard neutral model for a large fraction of MAX  
475 effectors. The signatures of adaptive evolution detected at MAX effectors, combined with their extensive  
476 presence/absence variation, are consistent with their central role in coevolutionary interactions with  
477 host-derived ligands that impose strong selection on virulence effectors.

478

479 *Adaptive evolution at MAX effectors*

480 Rates of evolution determined from orthologous comparisons with outgroup sequences revealed that, for  
481 a large fraction of MAX effectors, non-synonymous changes have accumulated faster than synonymous  
482 changes. The fast rate of amino-acid change at MAX effectors is consistent with a classic arms race  
483 scenario, which entails a series of selective sweeps as new virulent haplotypes - capable of avoiding  
484 recognition by plant immune receptors that previously prevented pathogen multiplication - spread to  
485 high frequency [49, 50]. Furthermore, it is important to note that although large values of the  $d_N/d_S$  ratio  
486 provide strong evidence for directional selection, small values do not necessarily indicate the lack thereof,  
487 as  $d_N/d_S$  ratios represent the integration of genetic drift, constraint, and adaptive evolution [50][51]. Much

488 of the adaptive changes at MAX effectors probably took place before the radiation of *P. oryzae* on its  
489 various hosts. However, the observation that  $d_N/d_S$  values determined from orthologous comparisons with  
490 outgroup are higher at the species level than at the sub-specific lineage level indicates that part of the  
491 signal of directional selection derives from inter-lineage amino acid differences associated with host-  
492 specialization. Our structural modeling indicates that it is preferentially “turns” and “coils”, but also  
493 residues with intermediate solvent accessibility, which often evolve at an unusually fast rate, and  
494 therefore that these are probably the residues of MAX proteins preferentially involved in coevolutionary  
495 interactions with host-derived molecules.

496 MAX effectors are characterized by a remarkable excess of non-synonymous polymorphism,  
497 compared to synonymous polymorphism, at the species level, but also - albeit to a lesser extent - at the  
498 sub-specific lineage level. This raises the question of how polymorphisms are maintained in the face of  
499 adaptive evolution, given that selective sweeps under a classic arms race scenario are expected to erase  
500 variation [6, 9]. Directional selection restricted to host-specific lineages - i.e., local adaptation - may  
501 contribute to the signature of multiallelic balancing selection observed at the species level. The  
502 observation of a positive correlation between  $\pi_N/\pi_S$  and the differentiation statistic  $F_{ST}$  together with the  
503 fact that most MAX effectors are monomorphic at the lineage level, are consistent with a role of divergent  
504 selection exerted by hosts in the maintenance of species-wide diversity at MAX effectors. However, the  
505 finding that MAX effectors with a defined  $\pi_N/\pi_S$  at the sub-specific lineage level (i.e., MAX effectors with  
506  $\pi_S \neq 0$ ) present a higher ratio than the other genes also indicates that the adaptive evolution process is not  
507 simply one of successive selective sweeps. This is consistent with balancing selection acting at the lineage  
508 level, through which polymorphisms in MAX virulence effectors are maintained due to spatiotemporal  
509 variation in selection pressures posed by the hosts – a process known as the trench-warfare model [49].  
510 Our structural modeling suggests in particular that the “coils” and “turns” are the preferred substrate of  
511 these coevolutionary interactions leading to the maintenance of elevated polymorphism at MAX  
512 virulence effectors.

513

514

515 *Expression kinetics of MAX effectors*



516 Expression profiling showed that the MAX effector repertoire was induced specifically and massively  
517 during infection. Depending on the host genotype, between 64 and 78% of the MAX effectors were  
518 expressed and expression was particularly strong during the early stages of infection. These findings are  
519 consistent with previous studies that analyzed genome-wide gene expression during rice infection or  
520 specifically addressed MAX effector expression, and they reinforce the hypothesis that MAX effectors  
521 are crucial for fungal virulence and specifically involved in the biotrophic phase of infection [17, 52].

522         How this coordinated deployment of the MAX effectors is regulated remains largely unknown.  
523 Genome organization does not seem to be a major factor, since MAX effectors do not colocalize and more  
524 generally, there is no clustering of effectors in the *P. oryzae* genome, only a slight enrichment in  
525 subtelomeric regions [52, 53]. This differs from other pathogenic fungi, such as *Leptosphaeria maculans*,  
526 for which early-expressed effectors are clustered in AT-rich isochores, and co-regulated by epigenetic  
527 mechanisms [54]. Analysis of promoter regions of MAX effectors did not identify common DNA motifs  
528 that may be targeted by transcription factors, and no such transcriptional regulators that would directly  
529 regulate large fractions of the effector complement of *P. oryzae* have been identified yet. The few known  
530 transcriptional networks controlled by regulators of *P. oryzae* pathogenicity generally comprise different  
531 classes of fungal virulence genes such as secondary metabolism genes or carbohydrate-active enzymes;  
532 they are not restricted to effectors or enriched in MAX effectors. For instance, Rgs1, a regulator of G-  
533 protein signaling necessary for appressorium development, represses the expression of 60 temporally co-  
534 regulated effectors in axenic culture and during the pre-penetration stage of plant infection [55].  
535 However, among them are only two MAX effectors, *MAX15* (*MGG05424*) and *MAX67* (*MGG16175*).  
536 This suggests that multiple complementary mechanisms contribute to the precise coordination of MAX  
537 effector expression during rice invasion.

538         Expression profiling also revealed that the plant host genotype strongly influenced the expression  
539 of the MAX effector repertoire, suggesting that plasticity in effector expression may contribute to the  
540 adaptation of *P. oryzae* to its hosts. MAX effectors were stronger expressed in the more resistant Kitaake  
541 rice variety than in highly susceptible Maratelli rice. This is reminiscent of other pathogenic fungi, such  
542 as *Fusarium graminearum* and *L. maculans*, for which a relationship between host resistance levels and

543 effector expression was established [56, 57]. Specific experiments will have to be performed to analyze  
544 in more detail this potential link between plant resistance and MAX effector expression.

545

#### 546 *Presence/absence polymorphism of MAX effectors*

547 Pangenome analyses demonstrated extensive variability in the MAX effector repertoire. In cases where  
548 MAX effectors are specifically absent from some lineages, but present in most or all others, it is tempting  
549 to hypothesize that they experienced immune-escape loss-of-function mutations that directly contributed  
550 to host range expansion or host shifts. A possible example of such a mechanism is the non-MAX effector  
551 *PWT3* of *P. oryzae* that is specifically absent from the *Triticum*-infecting lineage [29]. *PWT3* triggers  
552 resistance in wheat cultivars possessing the *RWT3* resistance gene [58], and its loss was shown to  
553 coincide with the widespread deployment of *RWT3* wheat. Similarly, the loss of the effector *AVR1-CO39*  
554 (*MAX86*), which is specifically absent from the *Oryza*-infecting lineage and that is detected by the rice  
555 NLR immune receptor complex RGA4/RGA5, has been suggested to have contributed to the initial  
556 colonization of rice by the *Setaria*-infecting lineage [20, 31, 59]. Two other orthologous *P. oryzae*  
557 effectors, *PWL1* and *PWL2*, exclude Eleusine and rice-associated isolates from infecting *Eragrostis*  
558 *curvula*, and can, therefore, also be considered as host-specificity determinants [28, 60]. Interestingly,  
559 ALPHAFOLD predicts *PWL2* to adopt a MAX effector fold [61]. In our study, however, gene knock-in  
560 experiments with *MAX79*, *MAX83*, and *MAX89* - specifically absent from the *Oryza*-infecting lineage -  
561 did not reveal a strong effect on virulence towards a large panel of rice varieties. Hence, unlike *AVR1-*  
562 *CO39*, these effectors are not key determinants of host-specificity. This suggests that overcoming non-  
563 host resistance is not the only and maybe not the main evolutionary scenario behind the specific loss of  
564 MAX effectors in the *Oryza*-infecting lineage. A possible alternative mechanism that can explain massive  
565 MAX effector loss during host shifts is a lack of functionality in the novel host. Some MAX effectors  
566 from a given lineage may have no function in the novel host, simply because their molecular targets are  
567 absent or too divergent in the novel host. Cellular targets of fungal effectors remain unknown for the  
568 most part, but knowledge of the molecular interactors of MAX effectors may help shed light on the drivers  
569 of their presence/absence polymorphism.

570

571 *Concluding remarks*

572 The discovery of large, structurally-similar, effector families in pathogenic fungi and the increasing  
573 availability of high-quality whole genome assemblies and high-confidence annotation tools, pave the way  
574 for in-depth investigations of the evolution of fungal effectors by interdisciplinary approaches combining  
575 state-of-the-art population genomics, protein structure analysis, and functional approaches. Our study  
576 on MAX effectors in the model fungus and infamous cereal killer *P. oryzae* demonstrates the power of  
577 such an approach. Our investigations reveal the fundamental role of directional and balancing selection  
578 in shaping the diversity of MAX effector genes and pinpoint specific positions in the proteins that are  
579 targeted by these evolutionary forces. This type of knowledge is still very limited on plant pathogens,  
580 and there are very few studies compared to the plethora literature on the evolution of virulence factors  
581 in human pathogens. Moreover, by revealing the concerted and plastic deployment of the MAX effector  
582 repertoire, our study highlights the current lack of knowledge on the regulation of these processes. A  
583 major challenge will now be to identify the regulators, target proteins and mode of action of MAX  
584 effectors, in order to achieve a detailed understanding of the relationships between the structure, function  
585 and evolution of these proteins.

## 586 METHODS 587

### 588 *Genome assemblies, gene prediction, and pan-genome analyses*

589 Among the 120 genome assemblies included in our study, 66 were already publicly available, and 54 were  
590 newly assembled (S1 Table). For the 54 newly assembled genomes, reads were publicly available for 50  
591 isolates, and four additional isolates were sequenced (available under BioProject PRJEB47684). For the  
592 four sequenced isolates, DNA was extracted using the same protocol as in ref. [62]. For the 54 newly  
593 generated assemblies, CUTADAPT [63] was used for trimming and removing low-quality reads, reads were  
594 assembled with ABYSS 2.2.3 [64] using eight different K-mer sizes, and we chose the assembly produced  
595 with the K-mer size that yielded the largest N50. For all 120 genome assemblies, genes were predicted by  
596 BRAKER 1 [65] using RNAseq data from ref. [21] and protein sequences of isolate 70-15 (Ensembl Fungi  
597 release 43). To complement predictions from BRAKER, we also predicted genes using AUGUSTUS 3.4.0  
598 [56][3] with RNAseq data from ref. [21], protein sequences of isolate 70-15 (Ensembl Fungi release 43),  
599 and *Magnaporthe grisea* as the training set. Gene predictions from BRAKER and AUGUSTUS were merged  
600 by removing the genes predicted by AUGUSTUS that overlapped with genes predicted by BRAKER.  
601 Repeated elements were masked with REPEATMASKER 4.1.0 (<http://www.repeatmasker.org/>). The quality  
602 of genome assembly and gene prediction was checked using BUSCO [32]. The homology relationships  
603 among predicted genes were identified using ORTHOFINDER v2.4.0 [36]. The size of pan- and core-  
604 genomes was estimated using rarefaction, by resampling combinations of one to 119 genomes, taking a  
605 maximum of 100 resamples by pseudo-sample size. Sequences for each orthogroup were aligned at the  
606 codon level (i.e., keeping sequences in coding reading frame) with TRANSLATORX [66], using MAFFT v7  
607 [67] as the aligner and default parameters for GBLOCKS [68].

608

### 609 *Identification of effectors sensu lato, and MAX effectors*

610 We predicted the secretome by running SIGNALP 4.1 [69], TARGET [70], and PHOBIUS [62] to identify  
611 signal peptides in the translated coding sequences of 12000 orthogroups. Only proteins predicted to be  
612 secreted by at least two methods were retained. Transmembrane domains were identified using TMHMM  
613 [71] and proteins with a transmembrane domain outside the 30 first amino acids were excluded from the

614 predicted secretome. Endoplasmic reticulum proteins were identified with PS-SCAN  
615 ([https://ftp.expasy.org/databases/prosite/ps\\_scan/](https://ftp.expasy.org/databases/prosite/ps_scan/)), and excluded.

616 To identify MAX effectors, we used the same approach as in the original study that described  
617 MAX effectors [17]. We first used PSI-BLAST [33] to search for homologs of known MAX effectors  
618 (AVR1-CO39, AVR-Pia, AvrPiz-t, AVR-PikD, and ToxB) in the predicted secretome. Significant PSI-  
619 BLAST hits (e-value < e-4) were aligned using a structural alignment procedure implemented in TM-ALIGN  
620 [35]. Three rounds of HMMER [34] searches were then carried out, each round consisting of alignment  
621 using TM-ALIGN, model building using HMMBUILD, and HMM search using HMMSEARCH (e-value < e-3).  
622 Only proteins with two expected, conserved Cysteines less than 33-48 amino acids apart were retained  
623 in the first two rounds of HMMER searches, as described in ref. [17].

624 Subsequent evolutionary analyses were conducted on three sets of orthogroups: MAX effectors,  
625 putative effectors, and other genes. The “MAX” group corresponded to 80 orthogroups for which at least  
626 10% of sequences were identified as MAX effectors. The “secreted proteins” groups corresponded to 3283  
627 orthogroups that were not included in the MAX group, and for which at least 10% of sequences were  
628 predicted to be secreted proteins. The last group included the remaining 11404 orthogroups.

629 For missing MAX effector sequences, we conducted an additional similarity search to correct for  
630 gene prediction errors. For a given MAX orthogroup and a given isolate, if a MAX effector was missing,  
631 we used BLAST-N to search for significant hits using the longest sequence of the orthogroup as the query  
632 sequence, and the isolate’s genome assembly as the subject sequence (S3 Table). We also corrected  
633 annotation errors, such as the presence of very short (typically <50bp) or very long (typically >500bp)  
634 introns, missing terminal exons associated with premature stops, or frameshifts caused by indels. All  
635 these annotation errors were checked, and corrected manually if needed, using the RNAseq data used in  
636 gene prediction in the INTEGRATIVE GENOME VIEWER [72, 73]. We also found that some orthogroups  
637 included chimeric gene resulting from erroneous merging of two genes that were adjacent in assemblies.  
638 This was the case for orthogroups OG0000093 and OG0010985, and we used RNA-seq data in the  
639 INTEGRATIVE GENOME VIEWER to split the merged genic sequences and keep only the sequence that  
640 corresponded to a MAX effector.

641 For evolutionary analyses conducted on single-copy orthologs, the 11 orthogroups that included  
642 paralogous copies of MAX effectors were split into sets of orthologous sequences using genealogies  
643 inferred using RAXML v8 [37], yielding a total of 94 single-copy MAX orthologs, of which 90 orthologs  
644 passed our filters on length and sample size to be included in evolutionary analyses (see below). For each  
645 split orthogroup, sets of orthologous sequences were assigned a number that was added to the  
646 orthogroup's identifier as a suffix (for instance paralogous sequences of orthogroup OG0000244 were  
647 split into orthogroups OG0000244\_1 and OG0000244\_2). Sequences were re-aligned using  
648 TRANSLATORX (see above) after splitting orthogroups.

649 All genome assemblies, aligned coding sequences for all orthogroups and single-copy orthologs  
650 are available in Zenodo, doi: 10.5281/zenodo.7689273.

651

### 652 *Homology modeling of MAX effectors*

653 To check that orthogroups predicted to be MAX effectors had the typical 3D structure of MAX effectors  
654 with two beta sheets of three beta strands each, eight experimental structures with MAX-like folds  
655 were selected as 3D templates for homology modeling (PDB identifiers of the templates: 6R5J, 2MM0,  
656 2MM2, 2MYW, 2LW6, 5A6W, 5Z1V, 5ZNG). For each of the 94 MAX orthologous groups, one  
657 representative protein was selected and homology models of this 1D query relative to each 3D template  
658 were built using MODELLER [74] with many alternative query-template threading alignments. The  
659 structural models generated using the alternative alignments were evaluated using a combination of  
660 different structural scores (DFIRE [75], GOAP [76], QMEAN [77]). Our homology modeling procedure  
661 will be described with more details in a manuscript currently in preparation. The best structural models  
662 for the 94 representative sequences of each group of MAX orthologs are available  
663 at <https://pat.cbs.cnrs.fr/magmax/model/>. The correspondence between MAX orthogroups identifiers  
664 used in homology modeling and MAX orthogroups identifiers resulting from gene prediction is given in  
665 S2 Table.

666

667

668

669 *Evolutionary analyses*

670 Lineage-level analyses were conducted on a dataset from which divergent or introgressed isolates were  
671 removed (G17 from *Eragrostis*, Bm88324 & Bd8401 from *Setaria*, 87-120; BF0072 and BN0019 from  
672 *Oryza*; IR0088 from *Echinochloa*), to limit the impact of population subdivision within lineages. The  
673 *Stenotaphrum*-infecting lineage was not included in lineage-level analyses due to the small sample size.

674 Nucleotide diversity [78] and population differentiation [43] were estimated using EGGLIB v3  
675 [79]. Sites with more than 30% missing data were excluded. Orthogroups with less than 10 sequences  
676 ( $n_{seff} < 10$ ,  $n_{seff}$  being the average number of used samples among sites that passed the missing data filter)  
677 or shorter than 30bp ( $l_{seff} < 30$ ,  $l_{seff}$  being the number of sites used for analysis after filtering out sites with  
678 too many missing data) were excluded from computations. For analyses of polymorphism at secondary  
679 structure annotations, the cutoff on  $l_{seff}$  was set at 10bp.

680 For the computation of  $d_N/d_S$  and quantification of adaptive evolution, we used isolate NI919 of  
681 *Pyricularia* sp. LS [45, 46] as the outgroup (assembly GCA\_004337975.1, European Nucleotide Archive).  
682 Genes were predicted in the outgroup assembly using EXONERATE V2.2 CODING2GENOME [80]. For each  
683 gene, the query sequence was a *P. oryzae* sequence randomly selected among sequences with the fewest  
684 missing data. In parsing EXONERATE output, we selected the sequence with the highest score, with a  
685 length greater than half the length of the query sequence.

686 The  $d_N/d_S$  ratio was estimated using a maximum likelihood approach (runmode=-2, CodonFreq=2  
687 in CODEML [81]), in pairwise comparisons of protein coding sequences (*i.e.*, without using a phylogeny).  
688 For each  $d_N/d_S$  we randomly selected 12 ingroup sequences and computed the average  $d_N/d_S$  across the 12  
689 ingroup/outgroup pairs.

690 Kruskal-Wallis tests were performed using the SCIPY.STATS.KRUSKAL library in PYTHON 3.7.  
691 Posthoc Mann-Whitney U-tests were performed using the SCIKIT\_POSTHOCS library in PYTHON 3.7, with  
692 p-values adjusted using the Bonferroni-Holm method.

693

694 *Constructs for the transformation of fungal isolates*

695 PCR products used for cloning were generated using the Phusion High-Fidelity DNA Polymerase  
696 (Thermo Fisher) and the primers listed in S7 Table. Details of the constructs are given in S8 Table. Briefly,

697 the pSC642 plasmid (derived from the pCB1004 vector), containing a cassette for the expression of a gene  
698 of interest under the control of the *AVR-Pia* promoter (*pAVR-Pia*) and the *Neurospora crassa*  $\beta$ -*tubulin*  
699 terminator (*t-tub*), was amplified by PCR with primers oML001 and oTK609 for the insertion of MAX  
700 genes listed in S9 Table. The MAX genes *Mo\_US0071\_000070* (*MAX79*), *Mo\_US0071\_046730* (*MAX89*)  
701 and *Mo\_US0071\_115900* (*MAX83*), amplified by PCR from genomic DNA of the *P. oryzae* isolate US0071,  
702 were inserted into this vector using the Gibson Assembly Cloning Kit (New England BioLabs). The final  
703 constructs were linearized using the KpnI restriction enzyme (Promega) before *P. oryzae* transformation.

704

#### 705 *Plant and fungal growth conditions*

706 Rice plants (*Oryza sativa*) were grown in a glasshouse in a substrate of 31% coconut peat, 30% Baltic  
707 blond peat, 15% Baltic black peat, 10% perlite, 9% volcanic sand, and 5% clay, supplemented with 3.5 g.L<sup>-1</sup>  
708 of fertilizer (Basacote® High K 6M, NPK 13-5-18). Plants were grown under a 12h-light photoperiod with  
709 a day-time temperature of 27 °C, night-time temperature of 21 °C, and 70% humidity. For spore  
710 production, the wild-type and transgenic isolates of *P. oryzae* Guy11 were grown for 14 days at 25°C  
711 under a 12h-light photoperiod on rice flour agar medium (20 g.L<sup>-1</sup> rice seed flour, 2.5 g.L<sup>-1</sup> yeast extract,  
712 1.5% agar, 500.000U penicillin g), supplemented with 240 µg.ml<sup>-1</sup> hygromycin for transgenic isolates. For  
713 mycelium production, plugs of mycelium of *P. oryzae* Guy11 were grown in liquid medium (10 g.L<sup>-1</sup>  
714 glucose, 3 g.L<sup>-1</sup> KNO<sub>3</sub>, 2 g.L<sup>-1</sup> KH<sub>2</sub>PO<sub>4</sub>, 2,5 g.L<sup>-1</sup> yeast extract, 500 000U penicillin g) for 5 days at 25°C in  
715 the dark under agitation.

716

#### 717 *Fungal transformation*

718 Protoplasts from the isolate Guy11 of *P. oryzae* were transformed by heat shock with 10µg of KpnI-  
719 linearized plasmids for the expression of MAX effectors or RFP as described previously [74]. After two  
720 rounds of antibiotic selection and isolation of monospores, transformed isolates were genotyped by Phire  
721 Plant Direct PCR (Thermo Scientific) using primers described in S7 Table. The Guy11 transgenic isolates  
722 expressing *AVR-Pia* and *AVR1-CO39* were previously generated [82, 83].

723

#### 724 *Fungal growth and infection assays*



725 For the analysis of interaction phenotypes, leaves of three-week-old rice plants were spray-inoculated  
726 with conidial suspensions (40 000 conidia.ml<sup>-1</sup> in water with 0.5% gelatin). Plants were incubated for 16  
727 hours in the dark at 25°C and 95% relative humidity, and then grown for six days in regular growth  
728 conditions. Seven days after inoculation, the youngest leaf that was fully expanded at the time of  
729 inoculation was collected and scanned (Scanner Epson Perfection V370) for further symptoms analyses.  
730 Phenotypes were qualitatively classified according to lesion types: no lesion or small brown spots  
731 (resistance), small lesions with a pronounced brown border and a small gray center (partial resistance),  
732 and larger lesions with a large gray center or dried leaves (susceptibility). For the analysis of gene  
733 expression, plants were spray-inoculated with conidial suspensions at 50 000 conidia.ml<sup>-1</sup> (in water with  
734 0.5% gelatin), and leaves were collected three days after inoculation.

735

#### 736 *RNA extraction and qRT-PCR analysis*

737 Total RNA extraction from rice leaves or Guy11 mycelium and reverse transcription were performed as  
738 described by ref. [84]. Briefly, frozen leaves and mycelium were mechanically ground. RNA was extracted  
739 using TRI-reagent® (Sigma-Aldrich) and chloroform separation. Denaturated RNA (5µg) was  
740 retrotranscribed and used for quantitative PCR using GoTaq qPCR Master Mix according to the  
741 manufacturer's instructions (Promega) at a dilution of 1/10 for mycelium and 1/7 for rice leaves. The  
742 primers used are described in S7 Table. Amplification was performed as described by ref. [84] using a  
743 LightCycler480 instrument (Roche), and data were extracted using the instrument software. To calculate  
744 *MAX* gene expressions, the  $2^{-\Delta\Delta CT}$  method and primers measured efficiency were used. Gene expression  
745 levels are expressed relative to the expression of constitutive reference gene *MoEF1α*.

746

#### 747 *Statistical analyses of phenotypic data*

748 For expression comparison between Kitaake and Maratelli infection, all analyses were performed using  
749 R ([www.r-project.org](http://www.r-project.org)). The entire kinetic experiment was repeated three times with five biological  
750 replicates for each time point. For each variety, gene, and experimental replicate, values corresponding  
751 to the day post-inoculation with the highest median expression were extracted for statistical analyses.

752 Expression data were not normally distributed so for each gene, differences between varieties were  
753 evaluated using non-parametric Mann-Whitney U-tests.

754

## 755 SUPPLEMENTARY MATERIALS

756 S1 Table. Genomic assemblies with metadata.

757 S2 Table. Nomenclature of MAX effectors.

758 S3 Table. Presence/absence of MAX effector orthologs.

759 S4 Table. The expression of MAX79, MAX83 and MAX89 in Guy11 does not trigger recognition in a panel of rice  
760 varieties.

761 S5 Table. Gene average of summary statistics of polymorphism, differentiation and divergence.

762 S6 Table.  $\pi_N$  and  $d_N/d_S$  in different classes of secondary structure annotations for MAX effectors with  $\pi_N/\pi_S > 1$  and  
763  $d_N/d_S > 1$ , respectively.

764 S7 Table. Primers for cloning and expression analyses.

765 S8 Table. Vector constructs.

766 S9 Table. Sequences of the MAX effectors in the isolate US0071 that were used for the complementation of Guy11.

767

768 S1 Figure. Expression patterns of MAX effectors during rice infection.

769 S2 Figure. Differential expression levels of MAX effectors upon infection of two different rice cultivars.

770 S3 Figure. Nucleotide diversity ( $\pi$ ), ratio of non-synonymous to synonymous nucleotide diversity ( $\pi_N/\pi_S$ ),  
771 orthogroup frequency for MAX effectors, other secreted proteins, and other genes.

772 S4 Figure. Assembly size, number of predicted genes, and number of orthogroups in lineages of *M. oryzae*.

773 S5 Figure. MAX79, MAX83 and MAX89 are expressed in the transgenic Guy11 isolates upon rice inoculation.

774 S6 Figure.  $F_{ST}$  versus  $\pi_N/\pi_S$  at MAX effectors

775 S7 Figure. Secondary structure annotations of MAX effectors aligned with TM-ALIGN.

776

777 S1 Data. Summary statistics per orthogroup.

778 S2 Data. Summary statistics per MAX effector ortholog, species wide, and per lineage.

779

## 780 REFERENCES

- 781 1. Schulze-Lefert P, Panstruga R. A molecular evolutionary concept connecting nonhost resistance, pathogen  
782 host range, and pathogen speciation. *Trends in Plant Science*. 2011;16(3):117-25. doi: 10.1016/j.tplants.2011.01.001.
- 783 2. Sánchez-Vallet A, Fouché S, Fudal I, Hartmann FE, Soyer JL, Tellier A, et al. The genome biology of  
784 effector gene evolution in filamentous plant pathogens. *Annual review of phytopathology*. 2018;56:21-40.
- 785 3. Haldane JBS. Disease and evolution. *Ricerca Scient* 1949;19:68-76.
- 786 4. Flor HH. Inheritance of pathogenicity in *Melampsora lini*. *Phytopathology*. 1942;32:653-69.
- 787 5. Barrett JA. Frequency-dependent selection in plant-fungal interactions. *Philosophical Transactions of the*  
788 *Royal Society of London B, Biological Sciences*. 1988;319(1196):473-83.
- 789 6. Bergelson J, Kreitman M, Stahl EA, Tian D. Evolutionary dynamics of plant R-genes. *Science*.  
790 2001;292(5525):2281-5.
- 791 7. Brown JKM. Chance and selection in the evolution of barley mildew. *Trends in Microbiology*.  
792 1994;2(12):470-5. PubMed PMID: 29.
- 793 8. Brown JKM. Durable resistance of crops to disease: a Darwinian perspective. *Annual review of*  
794 *phytopathology*. 2015;53:513-39.
- 795 9. Stahl EA, Dwyer G, Mauricio R, Kreitman M, Bergelson J. Dynamics of disease resistance polymorphism  
796 at the Rpm1 locus of *Arabidopsis*. *Nature*. 1999;400(6745):667-71.
- 797 10. Gladieux P, van Oosterhout C, Fairhead S, Jouet A, Ortiz D, Ravel S, et al. Extensive immune receptor  
798 repertoire diversity in disease-resistant rice landraces. *bioRxiv*. 2022:2022-12.
- 799 11. Bakker EG, Toomajian C, Kreitman M, Bergelson J. A genome-wide survey of R gene polymorphisms in  
800 *Arabidopsis*. *The Plant cell*. 2006;18(8):1803-18.
- 801 12. Bakker EG, Traw MB, Toomajian C, Kreitman M, Bergelson J. Low levels of polymorphism in genes that  
802 control the activation of defense response in *Arabidopsis thaliana*. *Genetics*. 2008;178(4):2031-43.
- 803 13. Ebert D, Fields PD. Host-parasite co-evolution and its genomic signature. *Nature Reviews Genetics*.  
804 2020;21(12):754-68.
- 805 14. Ebbole DJ, Chen M, Zhong Z, Farmer N, Zheng W, Han Y, et al. Evolution and Regulation of a Large  
806 Effector Family of *Pyricularia oryzae*. *Molecular Plant-Microbe Interactions*. 2021;34(3):255-69.
- 807 15. Seong K, Krasileva KV. Computational structural genomics unravels common folds and novel families in  
808 the secretome of fungal phytopathogen *Magnaporthe oryzae*. *Molecular Plant-Microbe Interactions*.  
809 2021;34(11):1267-80.
- 810 16. Seong K, Krasileva KV. Prediction of effector protein structures from fungal phytopathogens enables  
811 evolutionary analyses. *Nature Microbiology*. 2023;8(1):174-87.
- 812 17. de Guillen K, Ortiz-Vallejo D, Gracy J, Fournier E, Kroj T, Padilla A. Structure analysis uncovers a highly  
813 diverse but structurally conserved effector family in phytopathogenic fungi. *PLoS Pathog*. 2015;11(10):e1005228.
- 814 18. Savary S, Willocquet L, Pethybridge SJ, Esker P, McRoberts N, Nelson A. The global burden of pathogens  
815 and pests on major food crops. *Nature ecology & evolution*. 2019;3(3):430.
- 816 19. Fernandez J, Orth K. Rise of a cereal killer: the biology of *Magnaporthe oryzae* biotrophic growth. *Trends*  
817 *in microbiology*. 2018;26(7):582-97.
- 818 20. Couch BC, Fudal I, Lebrun M-H, Tharreau D, Valent B, van Kim P, et al. Origins of Host-Specific  
819 Populations of the Blast Pathogen *Magnaporthe oryzae* in Crop Domestication With Subsequent Expansion of  
820 Pandemic Clones on Rice and Weeds of Rice. *Genetics*. 2005;170(2):613-30. PubMed PMID: 61.
- 821 21. Pordel A, Ravel S, Charriat F, Gladieux P, Cros-Arteil S, Milazzo J, et al. Tracing the origin and  
822 evolutionary history of *Pyricularia oryzae* infecting maize and barnyard grass. *Phytopathology*. 2021;111(1):128-36.
- 823 22. Kato H, Yamamoto M, Yamaguchi-Ozaki T, Kadouchi H, Iwamoto Y, Nakayashiki H, et al. Pathogenicity,  
824 mating ability and DNA restriction fragment length polymorphisms of *Pyricularia* populations isolated from  
825 Gramineae, Bambusidaeae and Zingiberaceae plants. *Journal of General Plant Pathology*. 2000;66:30-47.
- 826 23. Urashima AS, Igarashi S, Kato H. Host range, mating type, and fertility of *Pyricularia grisea* from wheat  
827 in Brazil. *Plant Disease*. 1993;77(12):1211-6.
- 828 24. Igarashi S. *Pyricularia* em trigo. 1. Ocorrência de *Pyricularia* sp no estado do Paraná. *Fitopatol Bras*.  
829 1986;11:351-2.
- 830 25. Milazzo J, Pordel A, Ravel S, Tharreau D. First scientific report of *Pyricularia oryzae* causing gray leaf spot  
831 disease on perennial ryegrass (*Lolium perenne*) in France. *Plant Disease*. 2019;103(5):1024-.
- 832 26. Islam MT, Croll D, Gladieux P, Soanes DM, Persoons A, Bhattacharjee P, et al. Emergence of wheat blast  
833 in Bangladesh was caused by a South American lineage of *Magnaporthe oryzae*. *BMC biology*. 2016;14(1):84.
- 834 27. Gladieux P, Condon B, Ravel S, Soanes D, Maciel JLN, Nhani A, et al. Gene Flow between Divergent  
835 Cereal- and Grass-Specific Lineages of the Rice Blast Fungus *Magnaporthe oryzae*. *mBio*. 2018;9(1).
- 836 28. Sweigard JA, Carroll AM, Kang S, Farrall L, Chumley FG, Valent B. Identification, Cloning, and  
837 Characterization of *PWZ2*, a Gene for Host Species Specificity in the Rice Blast Fungus. *The Plant cell*.  
838 1995;7(8):1221-33. PubMed PMID: 260.

- 839 29. Inoue Y, Vy TTP, Yoshida K, Asano H, Mitsuoka C, Asuke S, et al. Evolution of the wheat blast fungus  
840 through functional losses in a host specificity determinant. *Science*. 2017;357(6346):80-3.
- 841 30. Asuke S, Tanaka M, Hyon G-S, Inoue Y, Vy TTP, Niwamoto D, et al. Evolution of an Eleusine-specific  
842 subgroup of *Pyricularia oryzae* through a gain of an avirulence gene. *Molecular Plant-Microbe Interactions*.  
843 2020;33(2):153-65.
- 844 31. Zheng Y, Zheng W, Lin F, Zhang Y, Yi Y, Wang B, et al. AVR1-CO39 is a predominant locus governing  
845 the broad avirulence of *Magnaporthe oryzae* 2539 on cultivated rice (*Oryza sativa* L.). *Molecular plant-microbe*  
846 *interactions*. 2011;24(1):13-7.
- 847 32. Simão FA, Waterhouse RM, Ioannidis P, Kriventseva EV, Zdobnov EM. BUSCO: assessing genome  
848 assembly and annotation completeness with single-copy orthologs. *Bioinformatics*. 2015;31(19):3210-2.
- 849 33. Altschul SF, Madden TL, Schäffer AA, Zhang J, Zhang Z, Miller W, et al. Gapped BLAST and PSI-BLAST:  
850 a new generation of protein database search programs. *Nucleic acids research*. 1997;25(17):3389-402.
- 851 34. Finn RD, Clements J, Eddy SR. HMMER web server: interactive sequence similarity searching. *Nucleic*  
852 *acids research*. 2011;39(suppl\_2):29-37.
- 853 35. Zhang Y, Skolnick J. TM-align: a protein structure alignment algorithm based on the TM-score. *Nucleic*  
854 *acids research*. 2005;33(7):2302-9.
- 855 36. Emms DM, Kelly S. OrthoFinder: solving fundamental biases in whole genome comparisons dramatically  
856 improves orthogroup inference accuracy. *Genome biology*. 2015;16(1):157.
- 857 37. Stamatakis A. RAxML version 8: a tool for phylogenetic analysis and post-analysis of large phylogenies.  
858 *Bioinformatics*. 2014;30(9):1312-3.
- 859 38. Frichot E, Mathieu F, Trouillon T, Bouchard G, François O. Fast and efficient estimation of individual  
860 ancestry coefficients. *Genetics*. 2014;196(4):973-83.
- 861 39. Huson DH, Bryant D. Application of Phylogenetic Networks in Evolutionary Studies. *Molecular Biology*  
862 *and Evolution*. 2006;23(2):254-67.
- 863 40. Tosa Y, Osue J, Eto Y, Oh H-S, Nakayashiki H, Mayama S, et al. Evolution of an avirulence gene, AVR1-  
864 CO39, concomitant with the evolution and differentiation of *Magnaporthe oryzae*. *Molecular Plant-Microbe*  
865 *Interactions*. 2005;18(11):1148-60.
- 866 41. Cesari S, Thilliez G, Ribot C, Chalvon V, Michel C, Jauneau A, et al. The rice resistance protein pair  
867 RGA4/RGA5 recognizes the *Magnaporthe oryzae* effectors AVR-Pia and AVR1-CO39 by direct binding. *The Plant*  
868 *cell*. 2013;25(4):1463-81. Epub 2013/04/04. doi: 10.1105/tpc.112.107201. PubMed PMID: 23548743; PubMed Central  
869 PMCID: PMC3663280.
- 870 42. Okuyama Y, Kanzaki H, Abe A, Yoshida K, Tamiru M, Saitoh H, et al. A multifaceted genomics approach  
871 allows the isolation of the rice Pia-blast resistance gene consisting of two adjacent NBS-LRR protein genes. *The*  
872 *Plant Journal*. 2011;66(3):467-79.
- 873 43. Weir BS, Cockerham CC. Estimating F-statistics for the analysis of population structure. *Evolution*.  
874 1984;38:1358-70. PubMed PMID: 283.
- 875 44. Hahn MW. *Molecular population genetics*: Oxford University Press; 2018.
- 876 45. Hirata K, Kusaba M, Chuma I, Osue J, Nakayashiki H, Mayama S, et al. Speciation in *Pyricularia* inferred  
877 from multilocus phylogenetic analysis. *Mycological Research*. 2007;111(7):799-808.
- 878 46. Gómez Luciano LB, Tsai IJ, Chuma I, Tosa Y, Chen Y-H, Li J-Y, et al. Blast fungal genomes show frequent  
879 chromosomal changes, gene gains and losses, and effector gene turnover. *Molecular Biology and Evolution*.  
880 2019;36(6):1148-61.
- 881 47. Yang Z. Likelihood ratio tests for detecting positive selection and application to primate lysozyme  
882 evolution. *Molecular biology and evolution*. 1998;15(5):568-73.
- 883 48. Frishman D, Argos P. Knowledge-based protein secondary structure assignment. *Proteins: Structure,*  
884 *Function, and Bioinformatics*. 1995;23(4):566-79.
- 885 49. Clay K, Kover PX. The Red Queen hypothesis and plant/pathogen interactions. *Annual review of*  
886 *Phytopathology*. 1996;34(1):29-50.
- 887 50. Van Valen L. A new evolutionary law. 1973.
- 888 51. Yang Z, Bielawski JP. Statistical methods for detecting molecular adaptation. *Trends in ecology &*  
889 *evolution*. 2000;15(12):496-503.
- 890 52. Yan X, Tang B, Ryder LS, MacLean D, Were VM, Eseola AB, et al. The transcriptional landscape of plant  
891 infection by the rice blast fungus *Magnaporthe oryzae* reveals distinct families of temporally co-regulated and  
892 structurally conserved effectors. *bioRxiv*. 2022:2022-07.
- 893 53. Chiapello H, Mallet L, Guerin C, Aguilera G, Amselem J, Kroj T, et al. Deciphering Genome Content and  
894 Evolutionary Relationships of Isolates from the Fungus *Magnaporthe oryzae* Attacking Different Host Plants.  
895 *Genome Biol Evol*. 2015;7(10):2896-912. Epub 2015/10/11. doi: 10.1093/gbe/evv187. PubMed PMID: 26454013;  
896 PubMed Central PMCID: PMC4684704.
- 897 54. Soyer JL, El Ghalid M, Glaser N, Ollivier B, Linglin J, Grandaubert J, et al. Epigenetic control of effector  
898 gene expression in the plant pathogenic fungus *Leptosphaeria maculans*. *PLoS genetics*. 2014;10(3):e1004227.

- 899 55. Tang B, Yan X, Ryder LS, Cruz-Mireles N, Soanes DM, Molinari C, et al. Rgs1 is a regulator of effector  
900 gene expression during plant infection by the rice blast fungus *Magnaporthe oryzae*. *bioRxiv*. 2022:2022-09.  
901 56. Fall LA, Salazar MM, Drnevich J, Holmes JR, Tseng M-C, Kolb FL, et al. Field pathogenomics of *Fusarium*  
902 head blight reveals pathogen transcriptome differences due to host resistance. *Mycologia*. 2019;111(4):563-73.  
903 57. Sonah H, Zhang X, Deshmukh RK, Borhan MH, Fernando WGD, Belanger RR. Comparative  
904 transcriptomic analysis of virulence factors in *Leptosphaeria maculans* during compatible and incompatible  
905 interactions with canola. *Frontiers in plant science*. 2016;7:1784.  
906 58. Arora S, Steed A, Goddard R, Gaurav K, O'Hara T, Schoen A, et al. A wheat kinase and immune receptor  
907 form host-specificity barriers against the blast fungus. *Nature Plants*. 2023:1-8.  
908 59. Farman ML, Eto Y, Nakao T, Tosa Y, Nakayashiki H, Mayama S, et al. Analysis of the structure of the  
909 *AVR1-Co39* avirulence locus in virulent rice-infecting isolates of *Magnaporthe grisea*. *Molecular Plant-Microbe*  
910 *Interactions*. 2002;15:6-16. PubMed PMID: 90.  
911 60. Kang S, Sweigard Ja Fau - Valent B, Valent B. The PWL host specificity gene family in the blast fungus  
912 *Magnaporthe grisea*. *Molecular Plant Microbe Interactions*. 1995;(0894-0282 (Print)).  
913 61. Brabham HJ, Gómez De La Cruz D, Were V, Shimizu M, Saitoh H, Hernández-Pinzón I, et al. Barley MLA3  
914 recognizes the host-specificity determinant PWL2 from rice blast (*M. oryzae*). *bioRxiv*. 2022:2022-10.  
915 62. Thierry M, Charriat F, Milazzo J, Adreit H, Ravel S, Cros-Arteil S, et al. Maintenance of divergent lineages  
916 of the Rice Blast Fungus *Pyricularia oryzae* through niche separation, loss of sex and post-mating genetic  
917 incompatibilities. *PLoS pathogens*. 2022;18(7):e1010687.  
918 63. Martin M. Cutadapt removes adapter sequences from high-throughput sequencing reads. *EMBnet journal*.  
919 2011;17(1):10-2.  
920 64. Simpson JT, Wong K, Jackman SD, Schein JE, Jones SJM, Birol I. ABySS: a parallel assembler for short  
921 read sequence data. *Genome research*. 2009;19(6):1117-23.  
922 65. Hoff KJ, Lange S, Lomsadze A, Borodovsky M, Stanke M. BRAKER1: unsupervised RNA-Seq-based  
923 genome annotation with GeneMark-ET and AUGUSTUS. *Bioinformatics*. 2015;32(5):767-9.  
924 66. Abascal F, Zardoya R, Telford MJ. TranslatorX: multiple alignment of nucleotide sequences guided by  
925 amino acid translations. *Nucleic acids research*. 2010;38(suppl\_2):W7-W13.  
926 67. Katoh K, Toh H. Recent developments in the MAFFT multiple sequence alignment program. *Briefings in*  
927 *Bioinformatics*. 2008;9(4):286-98. doi: 10.1093/bib/bbn013. PubMed PMID: ISI:000256756400004.  
928 68. Castresana J. Selection of conserved blocks from multiple alignments for their use in phylogenetic analysis.  
929 *Molecular biology and evolution*. 2000;17(4):540-52.  
930 69. Petersen TN, Brunak S, Von Heijne G, Nielsen H. SignalP 4.0: discriminating signal peptides from  
931 transmembrane regions. *Nature methods*. 2011;8(10):785-6.  
932 70. Emanuelsson O, Nielsen H, Brunak S, Von Heijne G. Predicting subcellular localization of proteins based  
933 on their N-terminal amino acid sequence. *Journal of molecular biology*. 2000;300(4):1005-16.  
934 71. Krogh A, Larsson B, Von Heijne G, Sonnhammer ELL. Predicting transmembrane protein topology with a  
935 hidden Markov model: application to complete genomes. *Journal of molecular biology*. 2001;305(3):567-80.  
936 72. Robinson JT, Thorvaldsdóttir H, Turner D, Mesirov JP. igv.js: an embeddable JavaScript implementation  
937 of the Integrative Genomics Viewer (IGV). *Bioinformatics*. 2023;39(1):btac830.  
938 73. Robinson JT, Thorvaldsdóttir H, Winckler W, Guttman M, Lander ES, Getz G, et al. Integrative genomics  
939 viewer. *Nature biotechnology*. 2011;29(1):24-6.  
940 74. Webb B, Sali A. Protein Structure Modeling with MODELLER. *Methods Mol Biol*. 2021;2199(1940-6029  
941 (Electronic)):239-55.  
942 75. Zhou H, Zhou Y. Distance-scaled, finite ideal-gas reference state improves structure-derived potentials of  
943 mean force for structure selection and stability prediction. *Protein science*. 2002;11(11):2714-26.  
944 76. Zhou H, Skolnick J. GOAP: a generalized orientation-dependent, all-atom statistical potential for protein  
945 structure prediction. *Biophysical journal*. 2011;101(8):2043-52.  
946 77. Benkert P, Tosatto SCE, Schomburg D. QMEAN: A comprehensive scoring function for model quality  
947 assessment. *Proteins: Structure, Function, and Bioinformatics*. 2008;71(1):261-77.  
948 78. Tajima F. Evolutionary relationship of DNA sequences in finite populations. *Genetics*. 1983;105(2):437-60.  
949 79. Siol M, Coudoux T, Ravel S, De Mita S. EggLib 3: A python package for population genetics and genomics.  
950 *Molecular Ecology Resources*. 2022;22(8):3176-87.  
951 80. Slater GSC, Birney E. Automated generation of heuristics for biological sequence comparison. *BMC*  
952 *bioinformatics*. 2005;6(1):1-11.  
953 81. Yang Z. PAML: a program package for phylogenetic analysis by maximum likelihood. *Computer*  
954 *applications in the biosciences*. 1997;13(5):555-6.  
955 82. Ribot C, Césari S, Abidi I, Chalvon V, Bournaud C, Vallet J, et al. The *Magnaporthe oryzae* effector AVR  
956 1-CO 39 is translocated into rice cells independently of a fungal-derived machinery. *The Plant Journal*.  
957 2013;74(1):1-12.

- 958 83. Ortiz D, De Guillen K, Cesari S, Chalvon V, Gracy J, Padilla A, et al. Recognition of the *Magnaporthe*  
959 *oryzae* effector AVR-Pia by the decoy domain of the rice NLR immune receptor RGA5. *The Plant cell*.  
960 2017;29(1):156-68.
- 961 84. Pélissier R, Buendia L, Brousse A, Temple C, Ballini E, Fort F, et al. Plant neighbour-modulated  
962 susceptibility to pathogens in intraspecific mixtures. *Journal of experimental botany*. 2021;72(18):6570-80.  
963
